# Supplementary material for: Miocene high elevation in the Central Alps
Source: Copernicus journal article supplement (doi:10.5194/se-12-2615-2021), 2021-11-23
Supplement: Supplementary file 1 [file se-12-2615-2021-supplement.zip]

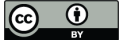

*Supplement of*

## **Miocene high elevation in the Central Alps**

**Emilija Krsnik et al.**

*Correspondence to:* Emilija Krsnik (emilija.krsnik@senckenberg.de)

- se-12-2615-2021-supplement-title-page.pdf
- Supplement updated\_EK
  - Figures separate
    - \* FigureS1.pdf
    - \* FigureS2.png
    - \* FigureS3.pdf
  - Supplementary Material\_Tables.xlsx
  - Supplementary Material\_updated\_EK.docx

The copyright of individual parts of the supplement might differ from the article licence.
