# Supplementary material for: Miocene high elevation in the Central Alps
Source: Copernicus journal article supplement (doi:10.5194/se-12-2615-2021), 2021-11-23
Supplement: Supplementary file 1 [file Supplementary Material_Tables.xlsx]

## Sheet: Index
SI6
Data tables to Krsnik et al. (2021) submitted to Solid Earth
Content of this file:
Table T1	Oxygen (δ18Oc, VSMOW, ‰) and carbon (δ13C, VPDB, ‰) stable isotope values for SMB pedogenic carbonates and calculated oxygen (δ18Ow, VSMOW, ‰) isotope values for meteoric (soil) water.
Table T2	δ47 and Δ47 values (in ‰) for SMB pedogenic carbonates, and derived Δ47 carbonate formation temperatures.
Table T3	δ47 and Δ47 values (in ‰) for CO2 gases equilibrated at 1000°C and 25°C, and empirical transfer functions (ETF).
Table T4	Δ47 values (in ‰) for standard material for clumped isotope analyses.
Table T5	Calculated paleoelevation differences between the SMB and the SFZ, and derived error of paleoelevation calculations.

## Sheet: T1_Stable isotope data
Table SI 1. Pedogenic carbonate oxygen (δ18Oc, VSMOW, ‰) and carbon (δ13C, VPDB, ‰) stable isotope values and calculated oxygen (δ18Ow, VSMOW, ‰) isotope values for meteoric (soil) water. Different sub-samples (e.g. MC954A to D; 18 EK 247a and b) are nodules from the same soil horizon. Carbonate δ18Oc data from Fontannen (MC--) is published in Campani et al. (2012). Only samples marked with * are…
SMB section	Sample nr.	Sample ID	Horizon	GPS coordinates	Stratigraphic position [m]	Age [Ma]	δ18Oc [‰VSMOW]	SE δ18Oc (2σn) [‰VSMOW]	δ18Ow [‰VSMOW]	δ13C [‰VPDB]	SE δ13C (2σn) [‰VPDB]
Fontannen	1	17 EK 3	1	47.00779 007.95158	990.5	13.3531	20.1098	0.03	-5.9902	-3.05647	0.02
	2	MC946		47.00779 007.95158	990.5	13.3531	20.0072	0.08	-6.09281	-3.16244	0.09
	3	MC954A	2	47.01225 007.95388	816	13.8633	20.2152	0.1	-5.88477	-2.88649	0.08
	4	MC954B		47.01225 007.95388	816	13.8633	20.4599	0.1	-5.64013	-5.38212	0.08
	5	MC954C		47.01225 007.95388	816	13.8633	20.4995	0.1	-5.60052	-3.12257	0.08
	6	MC954D		47.01225 007.95388	816	13.8633	20.5163	0.1	-5.58368	-3.34638	0.08
	7	MC952A	3	47.01225 007.95388	815.625	13.8644	20.2173	0.18	-5.88273	-2.96253	0.13
	8	MC952B		47.01225 007.95388	815.625	13.8644	20.376	0.18	-5.72404	-2.81719	0.13
	9	MC952C		47.01225 007.95388	815.625	13.8644	20.1007	0.18	-5.99928	-2.91102	0.13
	10	MC957A*	4	47.01055 007.95644	743.75	14.0745	20.7656	0.19	-5.3344	-5.86387	0.04
	11	MC957B*		47.01055 007.95644	743.75	14.0745	20.3305	0.19	-5.76954	-5.98832	0.04
	12	MC957C*		47.01055 007.95644	743.75	14.0745	20.366	0.19	-5.73404	-5.43563	0.04
	13	MC957D*		47.01055 007.95644	743.75	14.0745	20.4323	0.19	-5.66766	-5.92423	0.04
	14	17 EK 7*	5	47.01233 007.95530	725	14.129	19.6904	0.03	-6.40956	-6.08248	0.02
	15	17 EK 8*		47.01233 007.95530	725	14.129	19.468	0.03	-6.63198	-4.93656	0.02
	16	MC956A*		47.01233 007.95530	725	14.1293	19.6177	0.32	-6.48235	-5.0642	0.07
	17	MC956B*		47.01233 007.95530	725	14.1293	19.655	0.32	-6.44501	-6.9563	0.07
	18	MC956C*		47.01233 007.95530	725	14.1293	19.5984	0.32	-6.5016	-6.90365	0.07
	19	MC967A*	6	46.99712 007.97398	625	14.513	19.9541	0.18	-6.14589	-4.33287	0.13
	20	MC967B*		46.99712 007.97398	625	14.513	19.9156	0.18	-6.18436	-3.90229	0.13
	21	MC967C*		46.99712 007.97398	625	14.513	19.9228	0.18	-6.17717	-3.80231	0.13
	22	MC969A*	7	46.99782 007.97542	620	14.5205	20.0301	0.18	-6.06989	-4.99405	0.13
	23	MC969B*		46.99782 007.97542	620	14.5205	20.1108	0.2	-5.98923	-5.12729	0
	24	MC969C*		46.99782 007.97542	620	14.5205	19.8376	0.18	-6.26237	-4.23782	0.13
	25	MC969D*		46.99782 007.97542	620	14.5205	20.3031	0.18	-5.79693	-4.33892	0.13
	26	MC971A*	8	46.99809 007.97596	615.5	14.5272	20.4138	0.210697	-5.68621	-3.98214	0.04
	27	MC971B*		46.99809 007.97596	615.5	14.5272	20.1517	0.19	-5.94833	-4.27614	0.04
	28	MC971C*		46.99809 007.97596	615.5	14.5272	18.9714	0.19	-7.12857	-3.94247	0.04
	29	MC974A*	9	46.99404 007.97678	609	14.537	19.6197	0.08	-6.48027	-5.27371	0.09
	30	MC974B*		46.99404 007.97678	609	14.537	19.6624	0.18	-6.43762	-4.93307	0.13
	31	MC974C*		46.99404 007.97678	609	14.537	19.564	0.18	-6.53598	-4.71879	0.13
	32	MC966A*	10	46.99441 007.97877	605	14.543	19.6557	0.1	-6.44434	-6.08324	0.08
	33	MC966B*		46.99441 007.97877	605	14.543	19.578	0.1	-6.52198	-5.55856	0.08
	34	MC966C*		46.99441 007.97877	605	14.543	19.4799	0.1	-6.6201	-5.41884	0.08
	35	MC965A*		46.99441 007.97877	605	14.543	19.7068	0.19	-6.3932	-5.96289	0.04
	36	MC965B*		46.99441 007.97877	605	14.543	19.7376	0.19	-6.36241	-5.44017	0.04
	37	MC965C*		46.99441 007.97877	605	14.543	19.6466	0.19	-6.45338	-6.49549	0.04
	38	MC962A*	11	46.99554 007.97994	493	14.9333	20.6353	0.11	-5.46472	-4.34382	0.07
	39	MC962B*		46.99554 007.97994	493	14.9333	21.3699	0.151419	-4.73009	-3.42883	0.0963573
	40	MC961A*		46.99554 007.97994	493	14.9333	20.179	0.32	-5.92099	-4.20891	0.07
	41	MC961B*		46.99554 007.97994	493	14.9333	20.4274	0.08	-5.67265	-4.09844	0.09
	42	MC960A*	12	46.99551 007.98089	485	14.9715	20.6635	0.07	-5.43651	-6.03838	0.06
	43	MC960B*		46.99551 007.98089	485	14.9715	20.3058	0.1	-5.79423	-5.56651	0.08
	44	MC960C*		46.99551 007.98089	485	14.9715	20.0424	0.1	-6.05762	-6.45633	0.08
	45	MC959A*		46.99551 007.98089	485	14.9715	19.9599	0.08	-6.14008	-4.26732	0.09
	46	MC959B*		46.99551 007.98089	485	14.9715	19.9821	0.08	-6.11788	-5.4882	0.09
	47	MC959C*		46.99551 007.98089	485	14.9715	19.9756	0.08	-6.12437	-5.25337	0.09
	48	MC959D*		46.99551 007.98089	485	14.9715	20.1488	0.08	-5.95118	-4.00499	0.09
	49	MC977A*	13	46.99204 007.98245	403.5	15.3606	19.832	0.32	-6.26801	-3.78066	0.07
	50	MC977B*		46.99204 007.98245	403.5	15.3606	20.0171	0.365696	-6.08291	-3.21641	0.079996
	51	MC977C*		46.99204 007.98245	403.5	15.3606	19.9311	0.32	-6.16892	-4.68035	0.07
	52	MC976A*	14	46.99204 007.98245	403.25	15.3618	19.8354	0.143329	-6.26464	-4.15521	0.16538
	53	MC976B*		46.99204 007.98245	403.25	15.3618	19.8919	0.1	-6.20806	-4.72677	0.05
	54	MC976C*		46.99204 007.98245	403.25	15.3618	19.817	0.145834	-6.28302	-3.85555	0.16827
	55	MC975A*	15	46.99204 007.98245	403	15.363	19.9832	0.198512	-6.11678	-3.60254	0.04
	56	MC975B*		46.99204 007.98245	403	15.363	19.6275	0.19	-6.47252	-2.04246	0.04
	57	MC978A	16	46.99020 007.98060	325	15.7353	19.9148	0.1	-6.18522	-3.21069	0.08
	58	MC978B		46.99020 007.98060	325	15.7353	19.7819	0.1	-6.31808	-2.98466	0.08
	59	MC978C		46.99020 007.98060	325	15.7353	20.0167	0.1	-6.08335	-1.85685	0.08
	60	MC979A	17	46.98912 007.98070	318.75	15.7651	19.5289	0.19	-6.5711	-5.26132	0.04
	61	MC979B		46.98912 007.98070	318.75	15.7651	19.4467	0.19	-6.65334	-3.03935	0.04
	62	MC979C		46.98912 007.98070	318.75	15.7651	19.6056	0.19	-6.4944	-4.23638	0.04
	63	MC979D		46.98912 007.98070	318.75	15.7651	19.3629	0.11	-6.7371	-3.63249	0.07
	64	MC980A	18	46.98880 007.98110	312.5	15.795	19.6685	0.32	-6.43147	-5.75822	0.07
	65	MC980B		46.98880 007.98110	312.5	15.795	19.3576	0.32	-6.74236	-3.74754	0.07
	66	MC980C		46.98880 007.98110	312.5	15.795	19.9332	0.32	-6.16679	-5.23444	0.07
	67	MC981A	19	46.98808 007.98334	306.25	15.8248	19.4165	0.18	-6.68347	-2.98117	0.13
	68	MC981B		46.98808 007.98334	306.25	15.8248	19.2427	0.18	-6.85731	-4.53596	0.13
	69	MC981C		46.98808 007.98334	306.25	15.8248	19.8928	0.18	-6.20724	-3.55447	0.13
	70	MC982A	20	46.98719 007.98507	280	15.9501	19.7225	0.18	-6.37754	-5.74604	0.13
	71	MC982C		46.98719 007.98507	280	15.9501	19.4342	0.18	-6.66583	-4.16999	0.13
	72	MC982D		46.98719 007.98507	280	15.9501	19.0871	0.18	-7.01292	-3.1374	0.13
	73	MC982E		46.98719 007.98507	280	15.9501	19.1808	0.18	-6.91924	-3.27014	0.13
	74	MC982F		46.98719 007.98507	280	15.9501	19.3171	0.18	-6.78287	-3.96569	0.13
	75	17 EK 65	21	46.98735 007.98847	226.8	16.219	20.3547	0.0273978	-5.74533	-2.2759	0.02192
	76	17 EK 64	22	46.98735 007.98847	226.1	16.222	21.2713	0.0273978	-4.82867	-1.14242	0.02192
	77	17 EK 51	23	46.98721 007.99351	204.65	16.331	19.2933	0.0273978	-6.80672	-4.37472	0.02192
	78	17 EK 49	24	46.98721 007.99351	204.4	16.332	19.929	0.0273978	-6.17103	-4.37433	0.02192
	79	17 EK 41	25	46.98668 007.99341	201.2	16.348	20.5931	0.0273978	-5.50691	-4.04621	0.02192
	80	17 EK 43	26	46.98668 007.99341	201	16.349	20.2776	0.0273978	-5.82243	-3.23118	0.02192
	81	17 EK 42	27	46.98668 007.99341	200.7	16.351	19.3753	0.0273978	-6.72472	-3.70554	0.02192
	82	17 EK 44	28	46.98668 007.99341	200.5	16.352	19.0322	0.0273978	-7.06784	-2.85823	0.02192
	83	17 EK 39	29	46.98680 007.99405	198.2	16.364	20.1341	0.0273978	-5.96587	-4.29255	0.02192
	84	17 EK 35	30	46.98672 007.99442	197.2	16.369	19.5276	0.0273978	-6.57238	-4.9259	0.02192
	85	17 EK 36	31	46.98672 007.99442	197	16.37	19.2381	0.0273978	-6.86194	-4.64511	0.02192
	86	MC1014A	32	46.98640 007.99520	195.42	16.3777	19.8657	0.1	-6.2343	-5.86435	0.08
	87	MC1014B		46.98640 007.99520	195.42	16.3777	19.4335	0.1	-6.66653	-5.15117	0.08
	88	MC1014C		46.98640 007.99520	195.42	16.3777	19.4202	0.1	-6.6798	-5.25035	0.08
	89	17 EK 33		46.98640 007.99520	195.42	16.378	19.507	0.03	-6.59302	-5.25242	0.02
	90	MC1011A	33	46.98640 007.99520	194.5	16.3824	21.3266	0.08	-4.77339	-5.16667	0.09
	91	MC1011B		46.98640 007.99520	194.5	16.3824	19.4843	0.08	-6.61574	-4.75521	0.09
	92	MC1011C		46.98640 007.99520	194.5	16.3824	20.0633	0.08	-6.03669	-4.7108	0.09
	93	MC1011D		46.98640 007.99520	194.5	16.3824	19.8125	0.08	-6.28751	-4.12845	0.09
	94	MC1005A	34	46.98640 007.99520	193.75	16.3862	19.6567	0.32	-6.44334	-4.18697	0.07
	95	MC1005B		46.98640 007.99520	193.75	16.3862	19.6974	0.32	-6.40262	-3.72268	0.07
	96	MC1005C		46.98640 007.99520	193.75	16.3862	19.3546	0.32	-6.74544	-3.77472	0.07
	97	17 EK 29	35	46.98563 007.99560	184	16.436	20.3425	0.03	-5.75746	-3.92233	0.02
	98	MC1003A	36	46.98559 007.99562	180	16.4559	19.9492	0.1	-6.15076	-5.28908	0.08
	99	MC1003B		46.98559 007.99562	180	16.4559	19.8346	0.1	-6.26538	-5.66589	0.08
	100	MC1003C		46.98559 007.99562	180	16.4559	19.8325	0.1	-6.26752	-5.63078	0.08
	101	17 EK 31		46.98559 007.99562	180	16.456	19.7145	0.03	-6.38552	-2.01565	0.02
	102	17 EK 27	37	46.98504 007.99759	154	16.5878	20.0911	0.03	-6.00888	-1.7823	0.02
	103	MC1002A		46.98504 007.99759	154	16.5878	19.6199	0.19	-6.48012	-4.94491	0.04
	104	MC1002B		46.98504 007.99759	154	16.5878	19.4997	0.1	-6.60026	-4.37187	0.05
	105	MC1002C		46.98504 007.99759	154	16.5878	19.591	0.19	-6.50903	-4.90534	0.04
	106	MC1001A	38	46.98504 007.99759	153.5	16.5904	19.8119	0.11	-6.28806	-2.90062	0.07
	107	MC1001B		46.98504 007.99759	153.5	16.5904	19.7421	0.11	-6.35791	-3.32957	0.07
	108	17 EK 26	39	46.98463 007.99794	148	16.618	20.2112	0.03	-5.88882	-0.637279	0.02
	109	17 EK 24	40	46.98432 007.99833	142	16.649	20.2278	0.03	-5.87217	-0.767155	0.02
	110	17 EK 25		46.98432 007.99833	142	16.649	19.5537	0.03	-6.5463	-0.740209	0.02
	111	17 EK 16	41	46.98016 008.00564	65.05	17.364	19.2898	0.03	-6.81017	-4.90827	0.02
	112	17 EK 17	42	46.98016 008.00564	65	17.364	19.3159	0.03	-6.78415	-4.99153	0.02
	113	MC991A	43	46.97998 008.00579	60	17.3835	19.1893	0.18	-6.91074	-5.03558	0.13
	114	MC991B		46.97998 008.00579	60	17.3835	19.247	0.18	-6.853	-4.63846	0.13
	115	MC991C		46.97998 008.00579	60	17.3835	19.9896	0.196068	-6.11043	-2.90538	0.141605
	116	MC991D		46.97998 008.00579	60	17.3835	19.4076	0.18	-6.69236	-4.48708	0.13
	117	17 EK 13		46.97998 008.00579	60	17.384	19.3097	0.03	-6.79033	-4.90404	0.02
	118	17 EK 12	44	46.97998 008.00579	59.8	17.384	19.4782	0.03	-6.62179	-4.08709	0.02
	119	17 EK 14	45	46.97998 008.00579	59.6	17.385	19.5657	0.03	-6.53433	-4.7769	0.02
	120	MC990A	46	46.97998 008.00579	59.375	17.386	19.4799	0.11	-6.62008	-4.73553	0.07
	121	MC990B		46.97998 008.00579	59.375	17.386	19.3949	0.11	-6.70507	-4.58905	0.07
	122	MC990C		46.97998 008.00579	59.375	17.386	19.5107	0.11	-6.5893	-4.67764	0.07
	123	17 EK 10	47	46.98003 008.00701	6.25	17.53	20.3101	0.03	-5.78991	-4.12546	0.02
	124	MC988A		46.98003 008.00701	6.25	17.53	19.8372	0.08	-6.26283	-5.42003	0.09
	125	MC988B		46.98003 008.00701	6.25	17.53	19.7177	0.08	-6.38234	-3.5745	0.09
	126	MC988C		46.98003 008.00701	6.25	17.53	19.507	0.11	-6.59304	-3.9482	0.07
	127	MC988D		46.98003 008.00701	6.25	17.53	20.0681	0.08	-6.03193	-4.06864	0.09
	128	MC988E		46.98003 008.00701	6.25	17.53	19.5229	0.08	-6.57712	-3.55889	0.09
	129	MC988G		46.98003 008.00701	6.25	17.53	19.735	0.08	-6.36502	-4.80918	0.09
	130	MC988F		46.98003 008.00701	6.25	17.53	19.5951	0.08	-6.50494	-3.13213	0.09
	131	MC984A	48	46.98009 008.00721	3	17.607	19.3761	0.204432	-6.7239	-3.71059	0.147645
	132	MC984B		46.98009 008.00721	3	17.607	19.3649	0.08	-6.73512	-4.35654	0.09
	133	MC984C		46.98009 008.00721	3	17.607	19.0352	0.08	-7.06477	-4.19461	0.09
	134	MC987A	49	46.98008 008.00770	1	17.6149	18.9963	0.18	-7.10365	-4.78481	0.13
	135	MC987B		46.98008 008.00770	1	17.6149	19.077	0.18	-7.02297	-4.61165	0.13
	136	MC987C		46.98008 008.00770	1	17.6149	19.4126	0.18	-6.68739	-4.80739	0.13
	137	MC987D		46.98008 008.00770	1	17.6149	19.6778	0.18	-6.42219	-5.52854	0.13
	138	MC987E		46.98008 008.00770	1	17.6149	19.6088	0.07	-6.49123	-4.98567	0.06
	139	MC986A	50	46.98008 008.00770	0	17.6188	19.5383	0.1	-6.56166	-5.67353	0.08
	140	MC986B		46.98008 008.00770	0	17.6188	19.9245	0.1	-6.17552	-5.43664	0.08
	141	MC986C		46.98008 008.00770	0	17.6188	19.3993	0.1	-6.7007	-4.99918	0.08
Section	Sample nr.	Sample ID	Horizon	GPS coordinates	Stratigraphic position [m]	Age [Ma]	δ18Oc [‰VSMOW]	SE δ18Oc (2σn) [‰VSMOW]	δ18Ow [‰VSMOW]	δ13C [‰VPDB]	SE δ13C (2σn) [‰VPDB]
Jona	1	18 EK 211a	1	47.28493 008.87843	741.5	13.7109	21.6508	0.0159635	-5.54916	-5.93498	0.0116976
	2	18 EK 211b		47.28493 008.87843	741.5	13.7109	21.4788	0.0159635	-5.72116	-5.28983	0.0116976
	3	18 EK 209a	2	47.28487 008.87819	715	13.8254	26.714	0.0159635	-0.48603	0.0253059	0.0116976
	4	18 EK 209b		47.28487 008.87819	715	13.8254	26.7535	0.0159635	-0.44647	-0.154104	0.0116976
	5	18 EK 205a*	3	47.28436 008.87698	660.5	14.0607	23.0899	0.0159635	-4.11009	-5.43825	0.0116976
	6	18 EK 205b*		47.28436 008.87698	660.5	14.0607	23.5579	0.0159635	-3.64209	-5.38213	0.0116976
	7	18 EK 205c*		47.28436 008.87698	660.5	14.0607	23.7584	0.0159635	-3.44164	-3.92445	0.0116976
	8	18 EK 203a*	4	47.28064 008.87395	577.4	14.4195	22.0687	0.0159635	-5.13129	-5.92601	0.0116976
	9	18 EK 203b*		47.28064 008.87395	577.4	14.4195	22.1396	0.0159635	-5.06039	-4.61659	0.0116976
	10	18 EK 203c*		47.28064 008.87395	577.4	14.4195	23.2155	0.0159635	-3.98447	-3.39311	0.0116976
	11	18 EK 203d*		47.28064 008.87395	577.4	14.4195	22.2362	0.0159635	-4.96376	-4.93571	0.0116976
	12	18 EK 201a*	5	47.28064 008.87395	577.2	14.4203	21.8898	0.0159635	-5.31024	-5.77852	0.0116976
	13	18 EK 201b*		47.28064 008.87395	577.2	14.4203	22.8245	0.0159635	-4.3755	-3.52101	0.0116976
	14	18 EK 201c*		47.28064 008.87395	577.2	14.4203	22.1451	0.0159635	-5.05494	-4.69077	0.0116976
	15	18 EK 201d*		47.28064 008.87395	577.2	14.4203	22.3409	0.0159635	-4.85909	-5.10001	0.0116976
	16	18 EK 202b*		47.28064 008.87395	577.2	14.4203	22.621	0.0159635	-4.57897	-3.22441	0.0116976
	17	18 EK 199*	6	47.28064 008.87395	577	14.4212	22.9651	0.0159635	-4.23494	-4.70917	0.0116976
	18	18 EK 199a*		47.28064 008.87395	577	14.4212	22.1122	0.0159635	-5.08777	-3.04598	0.0116976
	19	18 EK 199b*		47.28064 008.87395	577	14.4212	22.5861	0.0159635	-4.61391	-4.85607	0.0116976
	20	18 EK 198a*	7	47.28064 008.87395	576.5	14.4233	23.5295	0.0159635	-3.67046	-0.833734	0.0116976
	21	18 EK 198b*		47.28064 008.87395	576.5	14.4233	23.6785	0.0159635	-3.52154	-0.699086	0.0116976
	22	18 EK 198c*		47.28064 008.87395	576.5	14.4233	23.5069	0.0159635	-3.69312	-0.778572	0.0116976
	23	18 EK 196a*	8	47.28064 008.87395	576	14.4255	25.2589	0.0159635	-1.94106	-1.81189	0.0116976
	24	18 EK 196b*		47.28064 008.87395	576	14.4255	26.0186	0.0159635	-1.18137	-1.11179	0.0116976
	25	18 EK 192a*	9	47.28011 008.87260	551.45	14.5315	22.9557	0.0159635	-4.24427	-7.92421	0.0116976
	26	18 EK 192b*		47.28011 008.87260	551.45	14.5315	23.2143	0.0159635	-3.98573	-8.46857	0.0116976
	27	18 EK 195c*		47.28011 008.87260	551.45	14.5324	23.0858	0.0159635	-5.13355	-9.08891	0.0116976
	28	18 EK 190*	10	47.28011 008.87260	551.25	14.5324	22.0664	0.0159635	-4.11418	-7.58023	0.0116976
	29	18 EK 188a*	11	47.28011 008.87260	551.15	14.5328	23.4376	0.0159635	-3.76235	-7.61694	0.0116976
	30	18 EK 188b*		47.28011 008.87260	551.15	14.5328	22.9547	0.0159635	-4.24526	-7.22737	0.0116976
	31	18 EK 188c*		47.28011 008.87260	551.15	14.5328	23.8332	0.0159635	-3.36678	-7.15058	0.0116976
	32	18 EK 188d*		47.28011 008.87260	551.15	14.5328	23.4012	0.0159635	-3.79884	-7.69597	0.0116976
	33	18 EK 186a*	12	47.28011 008.87260	551	14.5334	22.883	0.0159635	-4.317	-7.29257	0.0116976
	34	18 EK 186b*		47.28011 008.87260	551	14.5334	22.5612	0.0159635	-4.63883	-7.29919	0.0116976
	35	18 EK 186c*		47.28011 008.87260	551	14.5334	22.8802	0.0159635	-4.31977	-7.02439	0.0116976
	36	18 EK 185a*	13	47.28011 008.87260	550.4	14.536	24.1246	0.0159635	-3.07544	-6.13684	0.0116976
	37	18 EK 185b*		47.28011 008.87260	550.4	14.536	24.2004	0.0159635	-2.99964	-6.10374	0.0116976
	38	18 EK 183a*	14	47.28011 008.87260	547.4	14.549	21.8132	0.0159635	-5.38681	-4.07315	0.0116976
	39	18 EK 183b*		47.28011 008.87260	547.4	14.549	21.4094	0.0159635	-5.79063	-4.80345	0.0116976
	40	18 EK 183c*		47.28011 008.87260	547.4	14.549	21.1931	0.0159635	-6.0069	-4.84457	0.0116976
	41	18 EK 183d*		47.28011 008.87260	547.4	14.549	21.1181	0.0159635	-6.08187	-5.18396	0.0116976
	42	18 EK 180a*	15	47.28011 008.87260	547.2	14.5498	22.6509	0.0159635	-4.54911	-3.90527	0.0116976
	43	18 EK 180b*		47.28011 008.87260	547.2	14.5498	21.8421	0.0159635	-5.35789	-3.90896	0.0116976
	44	18 EK 182*		47.28011 008.87260	547.2	14.5498	21.4836	0.0159635	-5.71638	-4.92946	0.0116976
	45	18 EK 178a*	16	47.27921 008.87147	527	14.6643	23.7505	0.0159635	-3.44946	-0.127123	0.0116976
	46	18 EK 178b*		47.27921 008.87147	527	14.6643	21.2297	0.0159635	-5.97035	-2.98161	0.0116976
	47	18 EK 225a*	17	47.27778 008.87024	523.1	14.6975	26.6146	0.0159635	-0.585395	1.27912	0.0116976
	48	18 EK 225b*		47.27778 008.87024	523.1	14.6975	26.6346	0.0159635	-0.565392	1.21497	0.0116976
	49	18 EK 220*	18	47.27760 008.87120	520.2	14.7222	23.0476	0.0159635	-4.15238	-2.76651	0.0116976
	50	18 EK 218a*	19	47.27760 008.87120	520	14.7239	25.5394	0.0159635	-1.66064	0.349921	0.0116976
	51	18 EK 217a*	20	47.27731 008.86989	516	14.758	23.6702	0.0159635	-3.52975	-1.44558	0.0116976
	52	18 EK 217b*		47.27731 008.86989	516	14.758	22.3335	0.0159635	-4.86654	-2.68568	0.0116976
	53	18 EK 215a*	21	47.27731 008.86989	515.8	14.7597	22.0712	0.0159635	-5.12881	-3.29065	0.0116976
	54	18 EK 215b*		47.27731 008.86989	515.8	14.7597	22.027	0.0159635	-5.17299	-3.35595	0.0116976
	55	18 EK 215c*		47.27731 008.86989	515.8	14.7597	22.2841	0.0159635	-4.91586	-3.64414	0.0116976
	56	18 EK 214a*	22	47.27731 008.86989	515.7	14.7605	21.7866	0.0159635	-5.41339	-3.43213	0.0116976
	57	18 EK 214b*		47.27731 008.86989	515.7	14.7605	21.2266	0.0159635	-5.97338	-4.05164	0.0116976
	58	18 EK 157a*	23	47.27325 008.87700	497.1	14.9007	23.8476	0.0159635	-3.35244	-0.616935	0.0116976
	59	18 EK 157b*		47.27325 008.87700	497.1	14.9007	24.8944	0.0159635	-2.30561	-0.175549	0.0116976
	60	18 EK 159a*	24	47.27325 008.87700	497	14.9012	24.9631	0.0159635	-2.23686	0.0210338	0.0116976
	61	18 EK 159b*		47.27325 008.87700	497	14.9012	24.2963	0.0159635	-2.90374	0.143309	0.0116976
	62	18 EK 165Ia*	25	47.27244 008.87725	488.7	14.9356	21.3917	0.0159635	-5.8083	-4.44723	0.0116976
	63	18 EK 165Ib1*		47.27244 008.87725	488.7	14.9356	20.8935	0.0159635	-6.30652	-4.54962	0.0116976
	64	18 EK 165IIa*		47.27244 008.87725	488.7	14.9356	21.1689	0.0159635	-6.03107	-4.0778	0.0116976
	65	18 EK 165IIb*		47.27244 008.87725	488.7	14.9356	21.7147	0.0159635	-5.48531	-3.83372	0.0116976
	66	18 EK 166a*	26	47.27244 008.87725	488.6	14.936	21.771	0.0159635	-5.42903	-3.70686	0.0116976
	67	18 EK 166b*		47.27244 008.87725	488.6	14.936	21.5051	0.0159635	-5.6949	-3.84377	0.0116976
	68	18 EK 168a*	27	47.27244 008.87725	488.5	14.9365	22.6731	0.0159635	-4.52693	-2.69311	0.0116976
	69	18 EK 168b*		47.27244 008.87725	488.5	14.9365	20.9577	0.0159635	-6.24234	-4.52981	0.0116976
	70	18 EK 168c*		47.27244 008.87725	488.5	14.9365	21.401	0.0159635	-5.79897	-4.07267	0.0116976
	71	18 EK 172a*	28	47.27244 008.87725	488	14.9385	23.7736	0.0159635	-3.4264	-5.9255	0.0116976
	72	18 EK 172b*		47.27244 008.87725	488	14.9385	23.4588	0.0159635	-3.74115	-5.94378	0.0116976
	73	18 EK 174a*	29	47.27244 008.87725	487.85	14.9392	21.6229	0.0159635	-5.57714	-4.92633	0.0116976
	74	18 EK 174b*		47.27244 008.87725	487.85	14.9392	21.6875	0.0159635	-5.51254	-4.98483	0.0116976
	75	18 EK 177a*	30	47.27244 008.87725	487.55	14.9404	22.8815	0.0159635	-4.31854	-4.52537	0.0116976
	76	18 EK 177b*		47.27244 008.87725	487.55	14.9404	22.3735	0.0159635	-4.82653	-4.7485	0.0116976
	77	18 EK 177IIa*		47.27244 008.87725	487.55	14.9404	21.9649	0.0159635	-5.23513	-5.67785	0.0116976
	78	18 EK 117Ia*	31	47.26931 008.87775	443	15.0817	21.9045	0.0159635	-5.29553	-3.65676	0.0116976
	79	18 EK 117Ib*		47.26931 008.87775	443	15.0817	23.0765	0.0159635	-4.12354	-2.43228	0.0116976
	80	18 EK 117IIa*		47.26931 008.87775	443	15.0817	22.4467	0.0159635	-4.75327	-3.04899	0.0116976
	81	18 EK 117IIb*		47.26931 008.87775	443	15.0817	23.6755	0.0159635	-3.52452	-0.663551	0.0116976
	82	18 EK 114a*	32	47.26931 008.87775	441.6	15.0847	23.1544	0.0159635	-4.04555	-2.9546	0.0116976
	83	18 EK 114b*		47.26931 008.87775	441.6	15.0847	27.8435	0.0159635	0.643477	2.24446	0.0116976
	84	18 EK 132*	33	47.26955 008.86814	418	15.1368	25.3087	0.0159635	-1.8913	0.339847	0.0116976
	85	18 EK 131a*	34	47.26955 008.86814	413	15.1479	21.4095	0.0159635	-5.79049	-5.44988	0.0116976
	86	18 EK 131b*		47.26955 008.86814	413	15.1479	22.0427	0.0159635	-5.15732	-4.98158	0.0116976
	87	18 EK 130a*	35	47.26955 008.86814	405.3	15.1649	21.5046	0.0159635	-5.69535	-5.8565	0.0116976
	88	18 EK 130b*		47.26955 008.86814	405.3	15.1649	21.1953	0.0159635	-6.00466	-4.39143	0.0116976
	89	18 EK 130c*		47.26955 008.86814	405.3	15.1649	21.3761	0.0159635	-5.82386	-5.6698	0.0116976
	90	18 EK 130d*		47.26955 008.86814	405.3	15.1649	21.6206	0.0159635	-5.57936	-6.09037	0.0116976
	91	18 EK 128a*	36	47.26955 008.86814	405	15.1655	22.0517	0.0159635	-5.14832	-4.46826	0.0116976
	92	18 EK 128b*		47.26955 008.86814	405	15.1655	22.3923	0.0159635	-4.80766	-3.02051	0.0116976
	93	18 EK 128c*		47.26955 008.86814	405	15.1655	21.9209	0.0159635	-5.27906	-4.155	0.0116976
	94	18 EK 128d*		47.26955 008.86814	405	15.1655	21.3405	0.0159635	-5.85951	-4.70167	0.0116976
	95	18 EK 120a*	37	47.26922 008.86598	401	15.2023	21.0321	0.0159635	-6.16795	-3.98413	0.0116976
	96	18 EK 120b*		47.26922 008.86598	401	15.2023	21.2053	0.0159635	-5.99472	-3.77502	0.0116976
	97	18 EK 123a*	38	47.26915 008.86607	399.8	15.2101	20.897	0.0159635	-6.30302	-3.90379	0.0116976
	98	18 EK 123b*		47.26915 008.86607	399.8	15.2101	20.9967	0.0159635	-6.20328	-3.89522	0.0116976
	99	18 EK 269a*	39	47.26276 008.91377	367	15.4237	21.9945	0.0159635	-5.20553	-6.87382	0.0116976
	100	18 EK 269b*		47.26276 008.91377	367	15.4237	22.2409	0.0159635	-4.95914	-6.69112	0.0116976
	101	18 EK 272a*	40	47.26276 008.91377	366	15.4302	21.7277	0.0159635	-5.47226	-5.62568	0.0116976
	102	18 EK 272b*		47.26276 008.91377	366	15.4302	21.174	0.0159635	-6.02599	-6.39807	0.0116976
	103	18 EK 271a*	41	47.26276 008.91377	365.8	15.4316	21.5553	0.0159635	-5.64466	-6.0922	0.0116976
	104	18 EK 271b*		47.26276 008.91377	365.8	15.4316	21.9528	0.0159635	-5.24719	-5.26877	0.0116976
	105	18 EK 279b	42	47.25431 008.87472	258.75	16.1602	25.1544	0.0159635	-2.04564	-1.70959	0.0116976
	106	18 EK 279c		47.25431 008.87472	258.75	16.1602	24.9853	0.0159635	-2.21472	-0.406036	0.0116976
	107	18 EK 278b	43	47.25431 008.87472	258.55	16.1618	25.6832	0.0159635	-1.51676	-4.6485	0.0116976
	108	18 EK 277a	44	47.25431 008.87472	258.25	16.1641	25.8843	0.0159635	-1.31572	-3.2311	0.0116976
	109	18 EK 277b		47.25431 008.87472	258.25	16.1641	25.8618	0.0159635	-1.33819	-3.47904	0.0116976
	110	18 EK 277c		47.25431 008.87472	258.25	16.1641	25.6606	0.0159635	-1.53935	-2.11477	0.0116976
	111	18 EK 274	45	47.25431 008.87472	258	16.1661	21.6067	0.0159635	-5.59329	-3.868	0.0116976
	112	18 EK 275a		47.25431 008.87472	258	16.1661	21.3564	0.0159635	-5.84365	-3.75754	0.0116976
	113	18 EK 275b		47.25431 008.87472	258	16.1661	21.5716	0.0159635	-5.62842	-4.09756	0.0116976
	114	18 EK 275c		47.25431 008.87472	258	16.1661	21.429	0.0159635	-5.77101	-3.90593	0.0116976
	115	18 EK 142a	46	47.26772 008.95887	240.15	16.2834	21.3373	0.0159635	-5.86272	-3.92875	0.0116976
	116	18 EK 142b		47.26772 008.95887	240.15	16.2834	21.2127	0.0159635	-5.98725	-3.96202	0.0116976
	117	18 EK 142c		47.26772 008.95887	240.15	16.2834	21.2816	0.0159635	-5.91836	-4.05578	0.0116976
	118	18 EK 142d		47.26772 008.95887	240.15	16.2834	21.4876	0.0159635	-5.71235	-3.7036	0.0116976
	119	18 EK 144a		47.26772 008.95887	240.15	16.2834	21.3763	0.0159635	-5.82369	-3.88029	0.0116976
	120	18 EK 144b		47.26772 008.95887	240.15	16.2834	21.3835	0.0159635	-5.81651	-3.89556	0.0116976
	121	18 EK 138a	47	47.26772 008.95887	239.3	16.2861	26.1406	0.0159635	-1.05936	0.433288	0.0116976
	122	18 EK 138b		47.26772 008.95887	239.3	16.2861	23.8974	0.0159635	-3.30262	-1.99726	0.0116976
	123	18 EK 148a	48	47.26767 008.95895	232.3	16.3082	22.5511	0.0159635	-4.64888	-4.28005	0.0116976
	124	18 EK 148b		47.26767 008.95895	232.3	16.3082	22.4258	0.0159635	-4.77422	-4.44717	0.0116976
	125	18 EK 148c		47.26767 008.95895	232.3	16.3082	22.6475	0.0159635	-4.5525	-3.7747	0.0116976
	126	18 EK 147a	49	47.26767 008.95895	232	16.3092	21.636	0.0159635	-5.56403	-5.48766	0.0116976
	127	18 EK 147b		47.26767 008.95895	232	16.3092	23.0515	0.0159635	-4.14854	-3.57983	0.0116976
	128	18 EK 263a	50	47.25402 008.90770	104.75	16.7123	23.4255	0.0159635	-3.77455	-1.49328	0.0116976
	129	18 EK 263b		47.25402 008.90770	104.75	16.7123	22.9752	0.0159635	-4.22481	-1.90992	0.0116976
	130	18 EK 260a	51	47.25402 008.90770	102.85	16.7183	21.5735	0.0159635	-5.62649	-5.81853	0.0116976
	131	18 EK 260b		47.25402 008.90770	102.85	16.7183	24.9957	0.0159635	-2.20429	-3.19511	0.0116976
	132	18 EK 258b	52	47.25402 008.90770	102.7	16.7188	21.215	0.0159635	-5.98504	-6.08722	0.0116976
	133	18 EK 251a	53	47.25402 008.90770	102	16.721	21.8896	0.0159635	-5.31039	-4.87241	0.0116976
	134	18 EK 251b		47.25402 008.90770	102	16.721	21.4636	0.0159635	-5.73643	-5.14841	0.0116976
	135	18 EK CHR-1a		47.25402 008.90770	102	16.721	21.8909	0.0159635	-5.30915	-5.38675	0.0116976
	136	18 EK CHR-1b		47.25402 008.90770	102	16.721	21.8779	0.0159635	-5.32212	-5.16892	0.0116976
	137	18 EK 249a	54	47.25402 008.90770	101.7	16.722	22.2133	0.0159635	-4.98666	-4.21217	0.0116976
	138	18 EK 249b		47.25402 008.90770	101.7	16.722	22.3481	0.0159635	-4.85194	-4.54093	0.0116976
	139	18 EK 247a	55	47.25402 008.90770	101.45	16.7227	22.3473	0.0159635	-4.85267	-5.92193	0.0116976
	140	18 EK 247b		47.25402 008.90770	101.45	16.7227	23.5254	0.0159635	-3.67458	-2.09069	0.0116976
	141	18 EK 267b	56	47.25239 008.90860	85.7	16.7726	22.2958	0.0159635	-4.90421	-4.09831	0.0116976
Section	Sample nr.	Sample ID	Horizon	GPS coordinates	Stratigraphic position [m]	Age [Ma]	δ18Oc [‰VSMOW]	SE δ18Oc (2σn) [‰VSMOW]	δ18Ow [‰VSMOW]	δ13C [‰VPDB]	SE δ13C (2σn) [‰VPDB]
Aabach	1	12 EK 149 A*	1	47.23310 008.62681	352	14.8566	25.0037	0.011391	-1.59634	-0.823373	0.00989455
	2	12 EK 149 B*		47.23310 008.62681	352	14.8566	26.2776	0.011391	-0.322427	-0.538024	0.00989455
	3	12 EK 149 C*		47.23310 008.62681	352	14.8566	24.3893	0.011391	-2.21067	-4.02258	0.00989455
	4	12 EK 149 D*		47.23310 008.62681	352	14.8566	25.3142	0.011391	-1.2858	-1.45411	0.00989455
	5	12 EK 146 A*	2	47.23310 008.62681	350	14.8615	25.281	0.011391	-1.31904	-0.639041	0.00989455
	6	12 EK 146 B*		47.23310 008.62681	350	14.8615	24.6404	0.011391	-1.95957	-1.09319	0.00989455
	7	12 EK 143 A*	3	47.23310 008.62681	348	14.8663	24.9716	0.011391	-1.62842	-0.503013	0.00989455
	8	12 EK 143 B*		47.23310 008.62681	348	14.8663	25.1372	0.011391	-1.46279	-0.395736	0.00989455
	9	12 EK 143 C*		47.23310 008.62681	348	14.8663	24.8699	0.011391	-1.7301	-0.537875	0.00989455
	10	12 EK 143 D*		47.23310 008.62681	348	14.8663	23.9974	0.011391	-2.60258	-2.34702	0.00989455
	11	12 EK 141 A*	4	47.23310 008.62681	346.5	14.87	25.5964	0.011391	-1.00356	-3.23568	0.00989455
	12	12 EK 141 B*		47.23310 008.62681	346.5	14.87	24.1171	0.011391	-2.48289	-6.68619	0.00989455
	13	12 EK 141 C1*		47.23310 008.62681	346.5	14.87	24.3092	0.011391	-2.29084	-6.4645	0.00989455
	14	12 EK 141 C2*		47.23310 008.62681	346.5	14.87	24.2611	0.011391	-2.33892	-6.56394	0.00989455
	15	12 EK 141 C3*		47.23310 008.62681	346.5	14.87	24.8357	0.011391	-1.76432	-6.03797	0.00989455
	16	12 EK 141 C4*		47.23310 008.62681	346.5	14.87	24.1787	0.011391	-2.42133	-5.29745	0.00989455
	17	12 EK 141 C5*		47.23310 008.62681	346.5	14.87	24.324	0.011391	-2.27597	-6.80909	0.00989455
	18	12 EK 136 A*	5	47.23335 008.62601	343	14.8852	24.2965	0.011391	-2.30354	-0.953613	0.00989455
	19	12 EK 136 B*		47.23335 008.62601	343	14.8852	23.9871	0.011391	-2.61293	-0.954965	0.00989455
	20	12 EK 133 A*	6	47.23396 008.62538	327	14.9225	23.1721	0.011391	-3.42792	-4.06773	0.00989455
	21	12 EK 133 B*		47.23396 008.62538	327	14.9225	23.6761	0.011391	-2.92392	-3.41343	0.00989455
	22	12 EK 133 C*		47.23396 008.62538	327	14.9225	24.5515	0.011391	-2.04848	-2.16556	0.00989455
	23	12 EK 133 D*		47.23396 008.62538	327	14.9225	23.8085	0.011391	-2.79152	-2.82836	0.00989455
	24	12 EK 132 A*	7	47.23396 008.62426	322.7	14.9325	22.9289	0.011391	-3.67112	-5.62656	0.00989455
	25	12 EK 132 B*		47.23396 008.62426	322.7	14.9325	25.1191	0.011391	-1.48089	-0.918149	0.00989455
	26	12 EK 127 A*	8	47.23396 008.62426	321.3	14.9357	23.9884	0.011391	-2.61158	-3.23418	0.00989455
	27	12 EK 127 B*		47.23396 008.62426	321.3	14.9357	24.9138	0.011391	-1.68622	-1.25747	0.00989455
	28	12 EK 125 A*	9	47.23396 008.62426	321	14.9364	23.2604	0.011391	-3.33964	-5.71774	0.00989455
	29	12 EK 125 B*		47.23396 008.62426	321	14.9364	22.8273	0.011391	-3.77269	-4.67144	0.00989455
	30	12 EK 123 A*	10	47.23462 008.62401	302.2	14.9803	25.0464	0.011391	-1.55363	-1.70474	0.00989455
	31	12 EK 123 B*		47.23462 008.62401	302.2	14.9803	24.7239	0.011391	-1.87613	-2.53509	0.00989455
	32	12 EK 123 C*		47.23462 008.62401	302.2	14.9803	24.9678	0.011391	-1.63216	-2.56933	0.00989455
	33	12 EK 123 D*		47.23462 008.62401	302.2	14.9803	24.5858	0.011391	-2.01415	-2.1312	0.00989455
	34	12 EK 121 A*	11	47.23415 008.62332	301.2	14.9826	25.0522	0.011391	-1.54785	-1.19718	0.00989455
	35	12 EK 121 B*		47.23415 008.62332	301.2	14.9826	24.8279	0.011391	-1.77207	-1.64129	0.00989455
	36	12 EK 121 C*		47.23415 008.62332	301.2	14.9826	24.6247	0.011391	-1.9753	-0.43896	0.00989455
	37	12 EK 121 D*		47.23415 008.62332	301.2	14.9826	24.7931	0.011391	-1.80686	-0.399735	0.00989455
	38	12 EK 117 A*	12	47.23415 008.62332	300	14.9854	23.598	0.011391	-3.002	-2.08509	0.00989455
	39	12 EK 117 B*		47.23415 008.62332	300	14.9854	23.6221	0.011391	-2.9779	-1.72499	0.00989455
	40	12 EK 117 C*		47.23415 008.62332	300	14.9854	24.1754	0.011391	-2.42462	-1.88533	0.00989455
	41	12 EK 117 D*		47.23415 008.62332	300	14.9854	23.7874	0.011391	-2.81262	-2.39623	0.00989455
	42	12 EK 114 A*	13	47.23481 008.62382	285.5	15.0192	24.4985	0.011391	-2.10153	-0.752398	0.00989455
	43	12 EK 114 B*		47.23481 008.62382	285.5	15.0192	24.6207	0.011391	-1.97927	-1.10835	0.00989455
	44	12 EK 110 A*	14	47.23494 008.62365	267.9	15.2518	23.6817	0.011391	-2.91829	-1.68277	0.00989455
	45	12 EK 110 B*		47.23494 008.62365	267.9	15.2518	23.6843	0.011391	-2.91575	-1.24025	0.00989455
	46	12 EK 106 A*	15	47.23481 008.62383	258	15.3269	23.3164	0.011391	-3.28363	-3.09078	0.00989455
	47	12 EK 106 B*		47.23481 008.62383	258	15.3269	23.3872	0.011391	-3.2128	-3.69587	0.00989455
	48	12 EK 106 C*		47.23481 008.62383	258	15.3269	23.3654	0.011391	-3.23458	-2.75886	0.00989455
	49	12 EK 106 D*		47.23481 008.62383	258	15.3269	23.1715	0.011391	-3.42851	-2.37181	0.00989455
	50	12 EK 96 A*	16	47.23642 008.62400	226.6	15.5651	26.3767	0.011391	-0.223309	-6.29867	0.00989455
	51	12 EK 96 B*		47.23642 008.62400	226.6	15.5651	25.5955	0.011391	-1.00449	-6.1368	0.00989455
	52	12 EK 97 A*		47.23642 008.62400	226.6	15.5651	25.2087	0.011391	-1.39132	-5.80795	0.00989455
	53	12 EK 97 B*		47.23642 008.62400	226.6	15.5651	26.6103	0.011391	0.0102787	-6.48466	0.00989455
	54	12 EK 97 C*		47.23642 008.62400	226.6	15.5651	25.5855	0.011391	-1.01452	-6.02032	0.00989455
	55	12 EK 97 D*		47.23642 008.62400	226.6	15.5651	25.9196	0.011391	-0.680417	-6.21841	0.00989455
	56	12 EK 93 A*	17	47.23642 008.62400	225	15.5772	25.2469	0.011391	-1.35313	-1.29295	0.00989455
	57	12 EK 93 B*		47.23642 008.62400	225	15.5772	25.4644	0.011391	-1.13563	-0.687745	0.00989455
	58	12 EK 90 A	18	47.23666 008.62319	220	15.6152	23.7989	0.011391	-2.80112	-1.76715	0.00989455
	59	12 EK 90 B		47.23666 008.62319	220	15.6152	24.4656	0.011391	-2.13439	-0.0298242	0.00989455
	60	12 EK 90 C		47.23666 008.62319	220	15.6152	24.8906	0.011391	-1.70936	0.0409061	0.00989455
	61	12 EK 90 D		47.23666 008.62319	220	15.6152	23.8726	0.011391	-2.7274	-2.10722	0.00989455
	62	12 EK 89 A	19	47.23666 008.62319	219.8	15.6167	25.6312	0.011391	-0.96877	-0.306653	0.00989455
	63	12 EK 89 B		47.23666 008.62319	219.8	15.6167	24.9039	0.011391	-1.69605	-0.99751	0.00989455
	64	12 EK 85 A	20	47.23680 008.62291	215.8	15.647	23.3279	0.011391	-3.27206	-4.12405	0.00989455
	65	12 EK 85 B		47.23680 008.62291	215.8	15.647	23.7544	0.011391	-2.8456	-3.27612	0.00989455
	66	12 EK 84 A	21	47.23680 008.62291	215.5	15.6493	24.886	0.011391	-1.71397	-1.79573	0.00989455
	67	12 EK 84 B		47.23680 008.62291	215.5	15.6493	25.0202	0.011391	-1.57976	-1.48619	0.00989455
	68	12 EK 82 A	22	47.23680 008.62291	215.2	15.6516	24.7483	0.011391	-1.85173	-1.89179	0.00989455
	69	12 EK 82 B		47.23680 008.62291	215.2	15.6516	24.9385	0.011391	-1.66151	-0.936751	0.00989455
	70	12 EK 82 C		47.23680 008.62291	215.2	15.6516	25.0615	0.011391	-1.53848	-1.40989	0.00989455
	71	12 EK 82 D		47.23680 008.62291	215.2	15.6516	24.7442	0.011391	-1.85583	-1.18907	0.00989455
	72	12 EK 83 A		47.23680 008.62291	215.2	15.6516	24.9926	0.011391	-1.60736	-1.85859	0.00989455
	73	12 EK 83 B		47.23680 008.62291	215.2	15.6516	25.2155	0.011391	-1.38446	-1.55273	0.00989455
	74	12 EK 77 A	23	47.23911 008.62218	177	15.9414	24.1411	0.011391	-2.45888	-0.2426	0.00989455
	75	12 EK 77 B		47.23911 008.62218	177	15.9414	24.9256	0.011391	-1.67435	0.0392236	0.00989455
	76	12 EK 70 A	24	47.23959 008.62182	168.6	16.4818	23.8175	0.011391	-2.78246	-3.83348	0.00989455
	77	12 EK 70 B		47.23959 008.62182	168.6	16.4818	23.3526	0.011391	-3.24745	-6.02828	0.00989455
	78	12 EK 59	25	47.24262 008.62041	115.1	16.744	24.8163	0.011391	-1.7837	-1.56538	0.00989455
	79	12 EK 57	26	47.24274 008.62005	114.8	16.7453	25.6703	0.011391	-0.929734	-0.88103	0.00989455
	80	12 EK 57 B		47.24274 008.62005	114.8	16.7453	24.9382	0.011391	-1.66179	-1.35753	0.00989455
	81	12 EK 53 A	27	47.24274 008.62005	114.3	16.7474	24.3415	0.011391	-2.25855	-2.26548	0.00989455
	82	12 EK 53 B		47.24274 008.62005	114.3	16.7474	23.9571	0.011391	-2.64286	-1.95123	0.00989455
	83	12 EK 53 C		47.24274 008.62005	114.3	16.7474	23.0734	0.011391	-3.52659	-4.93129	0.00989455
	84	12 EK 53 D		47.24274 008.62005	114.3	16.7474	22.7081	0.011391	-3.89191	-5.62095	0.00989455
	85	12 EK 52 A	28	47.24274 008.62005	113.8	16.7496	25.292	0.011391	-1.30799	-1.31503	0.00989455
	86	12 EK 52 B		47.24274 008.62005	113.8	16.7496	25.3887	0.011391	-1.21133	-1.4251	0.00989455
	87	12 EK 26 A	29	47.24773 008.61487	30.7	17.104	25.2719	0.011391	-1.32809	-0.453949	0.00989455
	88	12 EK 26 B		47.24773 008.61487	30.7	17.104	25.2797	0.011391	-1.32026	-0.413707	0.00989455
	89	12 EK 25	30	47.24773 008.61487	30.2	17.1062	25.2202	0.011391	-1.37982	-0.260607	0.00989455
	90	12 EK 25 B		47.24773 008.61487	30.2	17.1062	25.3816	0.011391	-1.2184	-0.286905	0.00989455
	91	12 EK 16 k A	31	47.24773 008.61487	29.1	17.1109	24.6421	0.011391	-1.95792	-2.57093	0.00989455
	92	12 EK 16 k B		47.24773 008.61487	29.1	17.1109	23.9456	0.011391	-2.65442	-3.23963	0.00989455
	93	12 EK 16 g A1		47.24773 008.61487	29.1	17.1109	23.4358	0.011391	-3.16423	-3.60726	0.00989455
	94	12 EK 16 g A2		47.24773 008.61487	29.1	17.1109	23.6113	0.011391	-2.98866	-3.43549	0.00989455
	95	12 EK 16 g A3		47.24773 008.61487	29.1	17.1109	24.537	0.011391	-2.06296	-2.81967	0.00989455
	96	12 EK 16 g B		47.24773 008.61487	29.1	17.1109	23.7531	0.011391	-2.84687	-2.84891	0.00989455
	97	12 EK 13	32	47.24795 008.61543	26.7	17.1211	23.4936	0.011391	-3.10641	-0.270392	0.00989455
	98	12 EK 154 B	33	47.25068 008.61502	5	17.2137	22.8552	0.011391	-3.74483	-5.8533	0.00989455
	99	12 EK 154 A		47.25068 008.61502	5	17.2137	24.8686	0.011391	-1.73142	-4.85412	0.00989455
	100	12 EK 153 A	34	47.25113 008.61505	3	17.2222	22.4692	0.011391	-4.13076	-5.17583	0.00989455
	101	12 EK 153 B		47.25113 008.61505	3	17.2222	24.5007	0.011391	-2.09929	-4.50418	0.00989455

## Sheet: T2_Clumped isotope data 
Table SI 2. Clumped isotope compositions (δ47, Δ47) for pedogenic carbonate samples, empirical transfer function (ETF) for the respective periods of application, and derived carbonate formation temperatures following Petersen et al. (2019).
Section	Sample ID	age (Ma)	Date	Sample size (mg)	δ47raw (‰)	Δ47, raw (‰)	SD Δ47, raw (‰)	δ47bc (‰)	Δ47, bc (‰)	SD Δ47, bc (‰)	SE Δ47 (‰)	Δ47 CDES25 (‰)	T (°C) after Petersen et al., 2019a	SD T (°C)	SE T (±°C)	ETF period of application	ETF slope	ETF intercept	residual slope
Fontannen	MC 965b	14.54	2013-03-01	11.4	0.591	-0.285	0.018				0.006	0.677	29.1877			14.02.2013–28.03.2013	1.13477	0.923804	0.0172
			2013-03-05	7	0.4	-0.313	0.027				0.009	0.649	39.826			14.02.2013–28.03.2013	1.13477	0.923804	0.0172
			2013-03-08	7.2	0.482	-0.303	0.027				0.008	0.658	35.8989			14.02.2013–28.03.2013	1.13477	0.923804	0.0172
			2013-03-11	6.5	0.272	-0.287	0.023				0.007	0.681	27.7549			14.02.2013–28.03.2013	1.13477	0.923804	0.0172
											average Δ47 [‰]	0.66625	33.0487	4.90049	4
											SD [‰]	0.0132169
											SE [‰]	0.0105156
Fontannen	MC 961	14.93	2016-05-29	10.3	3.947	-0.22	0.03	3.793	-0.373	0.024	0.00858428	0.641	42.6657			03.05.2016–04.07.2016	1.09554	0.9606	-0.0004
			2017-01-31	9.7	3.326	-0.276	0.03	3.262	-0.34	0.016	0.00572286	0.67	31.7453			06.01.2017–10.07.2017	1.06663	0.943887	-0.0002
			2017-02-13	8.9	3.624	-0.275	0.031	3.541	-0.357	0.026	0.00929964	0.652	39			06.01.2017–10.07.2017	1.06663	0.943887	-0.0002
			2017-02-16	9.2	3.521	-0.323	0.031	3.485	-0.36	0.022	0.00786893	0.649	39.826			06.01.2017–10.07.2017	1.06663	0.943887	-0.0002
											average Δ47 [‰]	0.653	38.0404	4.05694	3
											SD [‰]	0.0106066
											SE [‰]	0.00843874
Jona	18 EK 192b	14.53	2018-09-22	10.1	2.121	-0.209	0.046	2.019	-0.311	0.023	0.0082266	0.675	29.9119			10.07.2018–19.10.2018	1.09668	0.926411	-0.0006
			2018-09-25	10.3	2.705	-0.138	0.037	2.549	-0.293	0.028	0.010015	0.695	22.8956			10.07.2018–19.10.2018	1.09668	0.926411	-0.0006
			2019-05-05	12.8				2.094	-0.325	0.016	0.00483435	0.66	35.5143			15.03.2019–05.08.2019	1.00968	0.900409	0
			2019-05-06	12.8				1.839	-0.315	0.033	0.00997085	0.67	31.7453			15.03.2019–05.08.2019	1.00968	0.900409	0
			2019-07-05	12.9				2.185	-0.334	0.019	0.00574079	0.651	39.0286			15.03.2019–05.08.2019	1.00968	0.900409	0
											average Δ47 [‰]	0.6702	31.6714	5.51261	3.42069
											SD [‰]	0.014905
											SE [‰]	0.00925352
Jona	18 EK 172a	14.94	2019-03-30	12				5.35	-0.299	0.032	0.0096687	0.687	25.6432			15.03.2019–05.08.2019	1.00968	0.900409	0
			2019-03-31	12.7				5.397	-0.319	0.021	0.00634509	0.667	32.8615			15.03.2019–05.08.2019	1.00968	0.900409	0
			2019-04-02	12.1				5.329	-0.308	0.028	0.00846012	0.678	28.8276			15.03.2019–05.08.2019	1.00968	0.900409	0
			2019-04-30	12.1				5.653	-0.304	0.036	0.0108773	0.682	27.3998			15.03.2019–05.08.2019	1.00968	0.900409	0
			2019-05-02	12.7				5.523	-0.315	0.02	0.00604294	0.671	31.376			15.03.2019–05.08.2019	1.00968	0.900409	0
											average Δ47 [‰]	0.677	29.1877	2.61213	1.62151
											SD [‰]	0.00723878
											SE [‰]	0.00449407
Aabach	12 EK 096a	15.57	2018-08-12	10.1	7.84	-0.058	0.027	7.578	-0.319	0.025	0.00894196	0.67	31.7453			10.07.2018–19.10.2018	1.09668	0.926411	-0.0006
			2018-08-14	10.3	7.856	-0.071	0.025	7.612	-0.313	0.022	0.00786893	0.676	29.5492			10.07.2018–19.10.2018	1.09668	0.926411	-0.0006
			2018-08-16	9	8.109	-0.05	0.036	7.837	-0.32	0.019	0.00679589	0.669	32.116			10.07.2018–19.10.2018	1.09668	0.926411	-0.0006
			2018-08-24	9.7	7.958	-0.066	0.038	7.685	-0.337	0.028	0.010015	0.65	39.4265			10.07.2018–19.10.2018	1.09668	0.926411	-0.0006
			2019-05-05	13				7.559	-0.324	0.03	0.00906441	0.662	34.7493			15.03.2019–05.08.2019	1.00968	0.900409	0
											average Δ47 [‰]	0.6654	33.4618	3.3465	2.07723
											SD [‰]	0.00889044
											SE [‰]	0.00551947
a Δ47-RFAC = (0.0383 ± 1.7E-6) * (106 / T2) + (0.258 ± 1.7E-5)
bc: data corrected for non-linearity (background-correction)
CDES25: data reported on the Carbon Dioxide Equilibrium Scale at a reaction temperature of 25 °C (Petersen et al., 2019).

## Sheet: T3_Equilibrated gases 
Table SI 3. Measured δ47 (‰) and Δ47 (‰) values of CO2 gases equilibrated at 1000°C ("heated gases", "HG") and at 25°C ("25G") used for calculation of the empirical transfer function (ETF) for the respective periods of application.
period of application			ETF		residual slope
14.02.2013–28.03.2013			y = 1.1348*x + 0.9238		0.0172
03.05.2016–04.07.2016			y = 1.0955*x + 0.9606		-0.0004
06.01.2017–10.07.2017			y = 1.0666*x + 0.9439		-0.0002
10.07.2018–19.10.2018			y = 1.0967*x + 0.9264		-0.0006
15.03.2019–05.08.2019			y = 1.0097*x + 0.9004		0
period of application 14.02.2013–28.03.2013												period of application 03.05.2016–04.07.2016																				period of application 06.01.2017–10.07.2017
equilibrated at 1000°C						equilibrated at 25°C						equilibrated at 1000°C										equilibrated at 25°C										equilibrated at 1000°C										equilibrated at 25°C
date	δ47, raw (‰)	Δ47, raw (‰)	SD Δ47, raw (‰)	SE Δ47, raw (‰)		date	δ47raw (‰)	Δ47, raw (‰)	SD Δ47, raw (‰)	SE Δ47, raw (‰)		date	δ47, raw (‰)	Δ47, raw (‰)	SD Δ47, raw (‰)	SE Δ47, raw (‰)	δ47bgcorr (‰)	Δ47, bgcorr (‰)	SD Δ47, bgcorr (‰)	SE Δ47, bgcorr (‰)		date	δ47, raw (‰)	Δ47, raw (‰)	SD Δ47, raw (‰)	SE Δ47, raw (‰)	δ47bgcorr (‰)	Δ47, bgcorr (‰)	SD Δ47, bgcorr (‰)	SE Δ47, bgcorr (‰)		date	δ47, raw (‰)	Δ47, raw (‰)	SD Δ47, raw (‰)	SE Δ47, raw (‰)	δ47bgcorr (‰)	Δ47, bgcorr (‰)	SD Δ47, bgcorr (‰)	SE Δ47, bgcorr (‰)		date	δ47, raw (‰)	Δ47, raw (‰)	SD Δ47, raw (‰)	SE Δ47, raw (‰)	δ47bgcorr (‰)	Δ47, bgcorr (‰)	SD Δ47, bgcorr (‰)
2013-02-14	-2.4166	-0.8607	0.0327	0.0103		05.02.2013	7.264	0.1029	0.0292	0.0092		2016-05-03	-25.3295	-1.63539	0.0247522	0.00782735	-24.5697	-0.8571	0.0287	0.00907574		2016-05-03	17.4684	0.497867	0.0171308	0.00541724	16.9201	-0.0413	0.0177	0.00559723		2017-01-06	-2.69446	-0.825546	0.0294854	0.00932409	-2.69414	-0.825229	0.0163421	0.00516783		2017-01-07	-6.36679	-0.0897783	0.0231535	0.00732176	-6.30624	-0.0288442	0.0170158
	16.1253	-0.5193	0.0199	0.0063		08.02.2013	7.2405	0.1367	0.024	0.0076		2016-05-03	-1.23062	-0.886343	0.0210602	0.00665982	-1.2239	-0.8797	0.0225	0.00711512		2016-05-09	-19.2183	-0.60025	0.0205398	0.00649524	-18.6611	-0.0325	0.0221	0.00698863		2017-01-09	-1.87161	-0.881403	0.0445333	0.0140827	-1.85971	-0.869488	0.0288284	0.00911633		2017-01-07	31.165	0.363669	0.01371	0.00433548	30.7651	-0.0243006	0.0101493
	-2.4078	-0.8191	0.0243	0.0077		11.02.2013	-30.3057	-0.5614	0.0246	0.0078		2016-05-09	-2.79733	-0.920984	0.0269637	0.00852667	-2.7235	-0.847	0.0289	0.00913898		2016-05-10	7.58402	0.23096	0.0187238	0.00592099	7.3226	-0.0285	0.0264	0.00834841		2017-01-10	-25.3914	-1.18169	0.0309697	0.00979349	-25.0594	-0.841433	0.0213017	0.00673619		2017-01-11	8.14861	0.0724188	0.0324482	0.010261	8.03194	-0.0433177	0.0147458
	-2.4078	-0.8202	0.0151	0.0048		14.02.2013	15.4999	0.2823	0.0312	0.0099		2016-05-10	14.8674	-0.395251	0.031777	0.0100488	14.4204	-0.8356	0.0391	0.0123645		2016-05-10	-29.1814	-0.906674	0.0304888	0.00964142	-28.3283	-0.0288	0.0221	0.00698863		2017-01-10	17.0571	-0.676402	0.0191175	0.00604549	16.8591	-0.870956	0.016626	0.0052576		2017-01-13	-28.4038	-0.368524	0.0188781	0.00596979	-28.077	-0.0322448	0.0178593
2013-02-19	-36.1174	-1.4346	0.0252	0.008		14.02.2013	15.3475	0.2666	0.0219	0.0069		2016-05-12	13.4371	-0.440069	0.023035	0.00728432	13.0008	-0.8703	0.02	0.00632456		2016-05-13	17.0284	0.483644	0.0248411	0.00785544	16.5105	-0.0258	0.0272	0.0086014		2017-01-11	-4.68962	-0.928338	0.0327944	0.0103705	-4.62235	-0.860811	0.021001	0.00664109		2017-01-17	-28.8915	-0.403018	0.029262	0.00925345	-28.5267	-0.0274931	0.0198649
	-36.0969	-1.4314	0.0309	0.0098		21.02.2013	6.2072	0.1195	0.0349	0.011		2016-05-12	-26.0301	-1.62136	0.0213355	0.00674689	-25.2704	-0.8426	0.0231	0.00730486		2016-05-18	-19.593	-0.589613	0.0234925	0.00742897	-19.0564	-0.0426	0.0195	0.00616644		2017-01-12	13.3355	-0.689819	0.0300175	0.00949235	13.1437	-0.878931	0.0281884	0.00891395		2017-01-24	31.0428	0.362755	0.0324429	0.0102594	30.6273	-0.0403759	0.0227659
2013-02-20	-1.6174	-0.8017	0.0284	0.009		21.02.2013	6.1416	0.1042	0.0277	0.0088		2016-05-17	12.7596	-0.452251	0.0296523	0.00937687	12.3687	-0.838	0.0325	0.0102774		2016-05-19	8.22094	0.223991	0.0191788	0.00606487	7.9584	-0.0364	0.0165	0.00521776		2017-01-12	-3.95482	-0.904414	0.0396972	0.0125533	-3.92491	-0.874409	0.0203883	0.00644735		2017-01-26	-6.55241	-0.107616	0.0291609	0.0092215	-6.46257	-0.0171952	0.0206482
	-1.7733	-0.8265	0.0336	0.0106		2013-02-25	-32.4476	-0.5669	0.033	0.0104		2016-05-18	-1.69767	-0.897027	0.0201509	0.00637229	-1.6618	-0.8611	0.0182	0.00575535		2016-05-23	-29.4698	-0.922245	0.0167316	0.00529101	-28.6126	-0.0398	0.017	0.00537587		2017-01-17	-25.962	-1.19537	0.0332021	0.0104994	-25.6463	-0.871678	0.0238922	0.00755538		2017-01-30	8.02204	0.0542933	0.0298648	0.00944408	7.93379	-0.0332632	0.0178229
2013-02-21	15.6993	-0.4929	0.0289	0.0091		2013-02-25	-32.5899	-0.592	0.0284	0.009		2016-05-19	-26.2738	-1.62665	0.0202565	0.00640566	-25.511	-0.8446	0.0217	0.00686214		2016-05-25	17.5876	0.472971	0.0171844	0.00543418	17.0543	-0.0514	0.0192	0.00607157		2017-01-17	14.2626	-0.702474	0.0183619	0.00580653	14.0876	-0.87485	0.0209943	0.00663898		2017-02-01	-28.9013	-0.35287	0.0262615	0.00830462	-28.5541	0.00456323	0.0202318
	15.7301	-0.4826	0.0345	0.0109								2016-05-25	-1.45171	-0.89049	0.021353	0.00675242	-1.424	-0.8627	0.0225	0.00711512		2016-05-30	8.50765	0.236728	0.021961	0.00694469	8.2134	-0.0551	0.0177	0.00559723		2017-01-20	-25.5707	-1.17051	0.0274805	0.0086901	-25.2552	-0.847141	0.0207088	0.0065487		2017-02-07	31.0825	0.357484	0.0188531	0.00596187	30.6717	-0.0410546	0.0142968
2013-02-25	-36.9015	-1.4233	0.0262	0.0083		HG regression line parameters						2016-05-27	-2.49227	-0.904438	0.0289144	0.00914353	-2.4182	-0.8303	0.0308	0.00973982		2016-06-04	17.8075	0.476843	0.0221277	0.0069974	17.2758	-0.0458	0.0221	0.00698863		2017-01-23	17.9599	-0.614389	0.0184669	0.00583975	17.6987	-0.870871	0.0213611	0.00675496		2017-02-09	-7.88766	-0.108692	0.0194487	0.00615023	-7.81567	-0.0361403	0.0154967
	-37.1391	-1.4583	0.0282	0.0089		0.0171687	-0.790646					2016-05-30	-25.0186	-1.57771	0.0246014	0.00777963	-24.3067	-0.8487	0.0197	0.00622969		2016-06-06	-20.8388	-0.648166	0.0233239	0.00737567	-20.2115	-0.0079	0.0127	0.00401609		2017-01-25	-26.162	-1.17591	0.0426757	0.0134952	-25.8407	-0.846386	0.0363447	0.0114932		2017-02-16	-29.3548	-0.387702	0.029431	0.00930689	-29.0043	-0.0268155	0.0257897
2013-02-26	-2.5404	-0.8257	0.0404	0.0128		0.000192287	0.00431236					2016-06-01	-25.9381	-1.59962	0.0188155	0.00594997	-25.1937	-0.8366	0.0173	0.00547074		2016-06-10	9.18826	0.23282	0.0194355	0.00614604	8.8946	-0.0582	0.0167	0.005281		2017-01-26	-4.01816	-0.901639	0.0217626	0.00688195	-3.97819	-0.861551	0.0243981	0.00771537		2017-02-22	30.993	0.31709	0.0313561	0.00991565	30.6093	-0.0551848	0.0248047
	-2.7085	-0.868	0.0185	0.0059		0.995132	0.0258644					2016-06-04	-24.5643	-1.55672	0.0385188	0.0121807	-23.8777	-0.854	0.0379	0.011985		2016-06-13	-29.2716	-0.888854	0.0297223	0.00939903	-28.4158	-0.0079	0.0253	0.00800056		2017-01-30	17.9684	-0.637905	0.0348487	0.0110201	17.7408	-0.861344	0.0221435	0.00700239		2017-02-24	-6.75415	-0.0890962	0.0320617	0.0101388	-6.66832	-0.00268355	0.0192224
2013-02-27	13.9405	-0.556	0.0321	0.0102		7972.11	39					2016-06-06	-1.35416	-0.873838	0.0315889	0.00998929	-1.3469	-0.8666	0.0274	0.00866464		2016-06-17	17.8299	0.503668	0.0223959	0.0070822	17.2736	-0.0431	0.0234	0.00739973		2017-01-31	-25.9451	-1.16545	0.0235813	0.00745706	-25.6702	-0.883563	0.0145807	0.00461082		2017-02-28	7.84799	0.0704024	0.0228	0.00720999	7.74548	-0.031318	0.0137401
	13.9782	-0.551	0.0258	0.0082		5.3331	0.0260898					2016-06-08	-3.2732	-0.941455	0.024038	0.00760148	-3.1779	-0.846	0.0154	0.00486991		2016-06-22	-19.9525	-0.57851	0.0246561	0.00779696	-19.4319	-0.0476	0.0236	0.00746298		2017-02-01	-1.86198	-0.856087	0.0235588	0.00744996	-1.86415	-0.858261	0.0305923	0.00967415		2017-03-04	-28.9689	-0.412694	0.0221593	0.00700737	-28.5974	-0.0302488	0.0114882
2013-02-28	-35.8129	-1.4122	0.0253	0.008								2016-06-09	17.6429	-0.31226	0.0227953	0.00720851	17.1057	-0.84	0.023	0.00727324		2016-06-23	9.07392	0.258967	0.0182783	0.00578012	8.7601	-0.0521	0.0182	0.00575535		2017-02-07	17.1021	-0.636431	0.0291792	0.00922728	16.8618	-0.872579	0.0116022	0.00366894		2017-03-10	31.2553	0.339724	0.0331873	0.0104947	30.8514	-0.0520474	0.0332983
	-36.0673	-1.4303	0.0323	0.0102		25G regression line parameters						2016-06-13	-25.6449	-1.61264	0.0232012	0.00733687	-24.8716	-0.8203	0.0223	0.00705188		2016-06-28	-28.8767	-0.876808	0.0211689	0.0066942	-28.0466	-0.0228	0.0154	0.00486991		2017-02-07	-25.9548	-1.17978	0.0287501	0.00909159	-25.6471	-0.864231	0.0227732	0.00720153		2017-03-13	-6.79127	-0.0949835	0.0381238	0.0120558	-6.71066	-0.0138283	0.0326302
2013-03-01	-1.8829	-0.8171	0.0266	0.0084		0.0179232	-0.0037138					2016-06-16	-1.62315	-0.909148	0.0288851	0.00913428	-1.5888	-0.8748	0.0295	0.00932872		2016-06-30	17.9834	0.499055	0.0192324	0.00608183	17.4342	-0.0408	0.019	0.00600833		2017-02-07	-1.56137	-0.873114	0.0409322	0.0129439	-1.54534	-0.857065	0.0206119	0.00651804		2017-03-17	8.23122	0.0730049	0.0234685	0.00742139	8.12063	-0.0366982	0.0130941
	-2.073	-0.841	0.0261	0.0083		0.000244025	0.00494155					2016-06-20	16.4369	-0.368345	0.0277101	0.0087627	15.9355	-0.8615	0.0266	0.00841166		2016-07-04	-20.3098	-0.552377	0.0260537	0.0082389	-19.7792	-0.0111	0.0204	0.00645105		2017-02-14	-25.3202	-1.15951	0.0292359	0.00924521	-25.0348	-0.867005	0.0246815	0.00780497		2017-03-21	-28.8502	-0.379324	0.0308541	0.00975692	-28.5194	-0.0387591	0.0172361
2013-03-04	17.629	-0.5323	0.0248	0.0079		0.998704	0.014505					2016-06-23	-1.90361	-0.873384	0.0176237	0.0055731	-1.8763	-0.8461	0.0183	0.00578697												2017-02-21	-2.16815	-0.894745	0.0306954	0.00970674	-2.1403	-0.866866	0.0188081	0.00594766		2017-03-24	30.9737	0.333599	0.0288489	0.00912281	30.5964	-0.0324997	0.0253017
2013-03-05	-37.2684	-1.4589	0.0274	0.0087		5394.65	7					2016-06-24	-24.8835	-1.56455	0.0176904	0.00559419	-24.1879	-0.8523	0.0136	0.0043007		HG regression line parameters										2017-02-22	17.1373	-0.672513	0.0353488	0.0111783	16.9283	-0.877919	0.0227699	0.00720046		2017-03-29	-6.49694	-0.0653002	0.0312211	0.00987299	-6.43734	-0.00531726	0.0426734
2013-03-07	-2.8455	-0.8347	0.0293	0.0093		1.13501	0.00147276					2016-06-28	18.5954	-0.27596	0.0198787	0.0062862	17.985	-0.8751	0.0115	0.00363662		-0.000351608	-0.852555									2017-02-24	-25.4395	-1.16617	0.0224144	0.00708807	-25.1443	-0.8637	0.0309323	0.00978166		2017-03-31	8.1539	0.0777651	0.0280159	0.0088594	8.0353	-0.0398804	0.0162141
	-2.9448	-0.8437	0.0177	0.0056								2016-06-29	-4.18507	-0.950144	0.0129689	0.00410113	-4.0787	-0.8434	0.0153	0.00483828		0.000194108	0.0032414									2017-02-27	-2.74919	-0.864817	0.0239526	0.00757449	-2.73765	-0.853259	0.0168474	0.00532763		2017-04-03	-28.8612	-0.397202	0.0394781	0.0124841	-28.4903	-0.0153882	0.0343378
2013-03-08	-36.6202	-1.44	0.0306	0.0097				HG	25G			2016-07-01	-25.7241	-1.57016	0.014795	0.00467858	-24.9974	-0.8255	0.0099	0.00313065		0.124849	0.0150718									2017-02-28	13.4855	-0.722746	0.0379613	0.0120044	13.3401	-0.866084	0.0226546	0.007164		2017-04-11	31.353	0.368384	0.0363606	0.0114982	30.9742	0.000947808	0.0283746
	-36.7954	-1.4437	0.0249	0.0079		Intercept, measured		-0.790646	-0.0037138													3.28119	23									2017-03-03	-26.3447	-1.18453	0.0316861	0.01002	-26.0365	-0.868453	0.0221889	0.00701676		2017-04-20	7.94681	0.0761268	0.022928	0.00725046	7.84848	-0.0214365	0.0227602
2013-03-11	16.6877	-0.501	0.0161	0.0051		Intercept, theoretical value		0.0266	0.9196													0.000745357	0.00522469									2017-03-07	-4.24351	-0.874711	0.0343776	0.0108712	-4.23346	-0.864629	0.0175116	0.00553764		2017-04-26	31.2761	0.338164	0.0299742	0.00947869	30.9089	-0.0179405	0.0169356
	16.6269	-0.5169	0.0277	0.0088		ETF regression line parameters																										2017-03-09	11.7211	-0.761711	0.0320989	0.0101506	11.5985	-0.882748	0.0166874	0.00527702		2017-04-28	-6.6893	-0.0868331	0.0317508	0.0100405	-6.62717	-0.0242857	0.0185382
2013-03-13	-3.5931	-0.8383	0.0285	0.009		Slope	1.13477															25G regression line parameters										2017-03-13	-2.57845	-0.86063	0.0269107	0.00850991	-2.59473	-0.876945	0.0290412	0.00918364		2017-05-03	-28.8024	-0.355496	0.0433823	0.0137187	-28.4438	0.0136138	0.017956
	-3.5239	-0.8369	0.031	0.0098		Intercept	0.923804															-0.000436108	-0.0374343									2017-03-15	-25.2898	-1.12504	0.03485	0.0110205	-25.0153	-0.843663	0.0209967	0.00663974		2017-05-09	-6.36439	-0.069869	0.0248595	0.00786128	-6.29078	0.00420201	0.0135658
2013-03-15	-36.6102	-1.3994	0.018	0.0057		residual slope	0.0172															0.000155048	0.00294075									2017-03-16	17.6116	-0.641062	0.0179779	0.00568512	17.3911	-0.857617	0.0109492	0.00346244		2017-05-24	-6.41821	-0.0312261	0.0299202	0.00946161	-6.36857	0.0187284	0.028024
	-36.7612	-1.4255	0.03	0.0095																		0.305326	0.0129452									2017-03-17	-4.64159	-0.911845	0.0585207	0.0185059	-4.58746	-0.857516	0.0228536	0.00722696		2017-06-07	-28.8114	-0.352185	0.0258545	0.00817592	-28.4693	-0.000130567	0.0263105
2013-03-18	16.7405	-0.5338	0.0307	0.0097																		7.91143	18									2017-03-21	-25.6305	-1.15658	0.0435455	0.0137703	-25.3441	-0.862967	0.0140435	0.00444095		2017-06-13	31.5757	0.375348	0.0456111	0.0144235	31.179	-0.0092887	0.0162009
	16.7239	-0.5341	0.0175	0.0055																		0.00132577	0.00301638									2017-03-24	18.0391	-0.674414	0.0290654	0.00919128	17.8489	-0.861156	0.028733	0.00908619		2017-06-21	-28.7829	-0.354517	0.029347	0.00928035	-28.4591	-0.0211911	0.0152736
2013-03-20	-2.5613	-0.815	0.0329	0.0104																												2017-03-24	-1.62898	-0.847532	0.0260388	0.00823418	-1.63741	-0.855972	0.0197806	0.00625519		2017-06-22	-7.59702	-0.0999694	0.0237189	0.00750056	-7.51098	-0.0132823	0.0145883
	-2.6945	-0.8235	0.0194	0.0061																				HG	25G							2017-03-27	17.0268	-0.685546	0.0246683	0.00780079	16.8533	-0.856002	0.0113249	0.00358123		2017-06-27	31.1533	0.340395	0.0247173	0.00781629	30.7861	-0.0159117	0.0202336
2013-03-22	-36.5628	-1.3447	0.0262	0.0083																		Intercept, measured		-0.852555	-0.0374343							2017-03-29	-25.3411	-1.11762	0.0360606	0.0114034	-25.0756	-0.845518	0.0344503	0.0108941		2017-06-29	-30.4798	-0.464373	0.0396881	0.0125505	-30.0829	-0.0551584	0.0249627
	-36.5335	-1.3596	0.0302	0.0095																		Intercept, theoretical value		0.0266	0.9196							2017-03-30	-1.22862	-0.86035	0.0309591	0.00979013	-1.24834	-0.880082	0.0199873	0.00632055		2017-07-04	31.226	0.337158	0.0269262	0.00851481	30.853	-0.0246476	0.0283304
2013-03-25	16.8686	-0.4573	0.0327	0.0103																		ETF regression line parameters										2017-04-04	-2.64074	-0.837918	0.0207438	0.00655976	-2.66389	-0.861106	0.0223659	0.00707272		2017-07-06	-28.893	-0.362265	0.0257646	0.00814749	-28.5581	-0.0174725	0.0188824
	16.8054	-0.5243	0.0229	0.0073																		Slope	1.09554									2017-04-04	-25.3716	-1.12065	0.0357499	0.0113051	-25.0905	-0.83249	0.0236029	0.0074639
2013-03-28	-2.2432	-0.8087	0.029	0.0092																		Intercept	0.9606									2017-04-05	12.6656	-0.716278	0.0317677	0.0100458	12.5153	-0.864632	0.0159599	0.00504697		HG regression line parameters
																						residual slope	-0.0004									2017-04-07	-26.2069	-1.13595	0.0191388	0.00605222	-25.914	-0.835524	0.0206107	0.00651767		-0.000300109	-0.859986
																																2017-04-10	-1.87785	-0.846883	0.0237932	0.00752407	-1.87593	-0.844961	0.0237966	0.00752516		0.000103842	0.00171832
																																2017-04-19	12.6014	-0.691417	0.0320649	0.0101398	12.4205	-0.869939	0.0225253	0.00712312		0.120434	0.0132449
																																2017-04-19	-2.57085	-0.851015	0.046431	0.0146828	-2.5665	-0.84665	0.0222354	0.00703145		8.35242	61
																																2017-04-25	-1.85031	-0.831167	0.0474871	0.0150167	-1.86227	-0.843149	0.0199357	0.00630422		0.00146523	0.010701
																																2017-04-25	-25.3295	-1.1358	0.0236721	0.00748576	-25.0488	-0.848112	0.0287748	0.00909938
																																2017-04-27	-1.50981	-0.856394	0.0359892	0.0113808	-1.50617	-0.852752	0.0151347	0.00478603		25G regression line parameters
																																2017-05-05	13.6203	-0.660107	0.0172464	0.0054538	13.4379	-0.839998	0.0120018	0.00379531		-0.000181624	-0.02277
																																2017-05-08	-4.74742	-0.889796	0.0433307	0.0137024	-4.71296	-0.855196	0.0131098	0.00414567		0.00012187	0.00283615
																																2017-05-10	-3.02383	-0.920551	0.0505269	0.015978	-2.96114	-0.857733	0.0198121	0.00626514		0.0566289	0.0177053
																																2017-05-25	-1.48189	-0.866326	0.0202259	0.00639599	-1.47324	-0.857676	0.0185876	0.00587791		2.22104	37
																																2017-05-30	-27.0311	-1.12315	0.0288593	0.0091261	-26.7477	-0.832218	0.0206729	0.00653735		0.00069625	0.0115987
																																2017-06-06	-25.6087	-1.1586	0.0559974	0.0177079	-25.3131	-0.855523	0.036863	0.0116571
																																2017-06-12	16.5977	-0.613132	0.025953	0.00820706	16.3735	-0.833568	0.0211528	0.00668909				HG	25G
																																2017-06-13	17.4452	-0.644094	0.0351559	0.0111173	17.2246	-0.860833	0.0244382	0.00772803		Intercept, measured		-0.859986	-0.02277
																																2017-06-26	-25.6692	-1.14638	0.0497729	0.0157396	-25.3654	-0.83493	0.0189415	0.00598983		Intercept, theoretical value		0.0266	0.9196
																																2017-06-28	17.6636	-0.666096	0.0249096	0.00787709	17.453	-0.872818	0.0209223	0.00661622		ETF regression line parameters
																																2017-06-30	-0.946318	-0.880289	0.0280436	0.00886816	-0.940337	-0.874308	0.027851	0.00880727		Slope	1.06663
																																2017-07-03	-0.592357	-0.87473	0.0380778	0.0120413	-0.597489	-0.879861	0.0219284	0.00693435		Intercept	0.943887
																																2017-07-05	-25.9583	-1.14225	0.0448295	0.0141763	-25.6692	-0.845804	0.0275738	0.0087196		residual slope	-0.000233828
																																2017-07-07	17.5066	-0.655924	0.0398332	0.0125964	17.3021	-0.856758	0.0211405	0.00668523
																																2017-07-10	-1.07088	-0.859699	0.035493	0.0112239	-1.06024	-0.849053	0.039142	0.0123778
[truncated: 29 more columns]

## Sheet: T4_ Standard material
Table SI 4. Δ47 values (in ‰) for standard material listed for respective time intervals of clumped isotope measurements.
Sample	Count of ∆47 (CDES) (‰)	Average of ∆47 (CDES) (‰)	SD ∆47 (CDES) (‰)	SE ∆47 (CDES) (‰)
time interval 14.02.2013–28.03.2013
Carrara	34	0.382135	0.0479172	0.00835955
MuStd	3	0.690826	0.00245485	0.00304909
time interval 03.05.2016–04.07.2016
Carrara	21	0.410934	0.0156136	0.00355362
ETH1	8	0.311205	0.0131182	0.00548354
ETH3	6	0.719558	0.00795601	0.00417466
MuStd	11	0.759858	0.0152901	0.00513603
Strauss	7	0.681603	0.0240789	0.0111346
time interval 06.01.2017–10.07.2017
Carrara	156	0.409217	0.0197513	0.00156191
ETH1	1	0.298976	0	0
ETH2	3	0.27985	0.00996559	0.012378
ETH3	9	0.709299	0.0207193	0.00796314
MuStd	74	0.747181	0.0189089	0.00219042
time interval 10.07.2018–19.10.2018
Carrara	29	0.40845	0.0168255	0.00320003
ETH1	30	0.297434	0.0141653	0.00264471
ETH2	30	0.304545	0.0167603	0.0031292
ETH3	31	0.71316	0.0129067	0.00236711
ETH4	7	0.55487	0.0164379	0.00760125
MuStd	16	0.754832	0.0189108	0.00503843
time interval 15.03.2019–05.08.2019
Carrara	24	0.399127	0.0138377	0.00292158
ETH1	59	0.297855	0.0104665	0.0013638
ETH2	57	0.299163	0.0126586	0.00167939
ETH3	55	0.698339	0.0118397	0.00160036
ETH4	27	0.0955936	0.00941774	0.00186277

## Sheet: T5_Paleoelevation data
Table SI 5. Calculated paleoelevation differences Δz (m) between low-elevation Swiss Molasse Basin (SMB) sections Fontannen and Jona and high-elevation Simplon Fault Zone (SFZ) for the time interval 15.5 Ma–14.0 Ma. We calculate paleoelevations based on two different water-calcite isotope exchange equilibrations (Kim & O'Neil, 1997; updated with Kim et al., 2007; and Coplen, 2007) and four differ…
								Calculated Δz (m)
SFZ δ18Ow (‰, SMOW)	SMB section	Temperature (°C)	SMB δ18Oc (‰, VSMOW)	SMB δ18Ow (‰, VSMOW)		D(δ18Ow) (‰, VSMOW)		Campani et al. (2012)a		Botsyun et al. (2020)b		Currie et al. (2005) / Rowley & Garzione (2007)c		Poage & Chamberlain (2001) Europed
				Kim et al., 2007	Coplen, 2007	Kim et al., 2007	Coplen, 2007	Kim et al., 2007	Coplen, 2007	Kim et al., 2007	Coplen, 2007	Kim et al., 2007	Coplen, 2007	Kim et al., 2007	Coplen, 2007
-14.6	Fontannen 2012	21	19.6244	-9.4	-10.9	-5.2	-3.7	2600	1850	2166.67	1541.67	2700.1	2048.71	2476.19	1761.9
-14.6	Fontannen	36	19.6185	-6.5	-8.1	-8.1	-6.5	4050	3250	3375	2708.33	3725.48	3194.79	3857.14	3095.24
-14.6	Jona	29.5021	21.4093	-5.8	-7.4	-8.8	-7.2	4400	3600	3666.67	3000	3933.44	3436.94	4190.48	3428.57
-14.6	Aabach	33	23.4	-3.1	-4.5	-11.5	-10.1	5750	5050	4791.67	4208.33	4618.68	4284.94	5476.19	4809.52
a -0.20‰/ 100 m
b -0.24‰/ 100 m
c (-6.14 x 1/1000) Δ(δ18Ow)4 - 0.6765Δ(δ18Ow)3 - 28.623Δ(δ18Ow)2 - 650.66Δ(δ18Ow)
d -0.21‰/ 100 m
Calculation of the paleoelevation estimate error
Paleoelevation error estimates are calculated based on the isotope lapse rate of (-0.2 ± 0.04‰/ 100 m; Campani et al., 2020). Estimation of error is based on combined uncertainties in Δ(δ18Ow) (error of SMB δ18Oc, (Δ47) carbonate formation temperatures, and SFZ δ18Ow) and the oxygen isotope lapse rate.
Error SFZ δ18Ow (±; ‰)		0.3
Error isotope lape rate (±; ‰)		0.04
Error SMB δ18Oc (±; ‰)	Fontannen	0.01
	Jona	0.2
	Aabach	0.3
Error Δ47 Temperature (±; ‰)	Fontannen	1.4
	Jona	1
	Aabach	0.4
Propagated error (±, ‰)	Fontannen	1.75
	Jona	1.54
	Aabach	1.04
Calculated elevation error (±; m)	Fontannen	870
	Jona	770
	Aabach	520
