# Supplementary figures and images for: Miocene high elevation in the Central Alps
Source: Copernicus journal article supplement (doi:10.5194/se-12-2615-2021), 2021-11-23

A

Legend:

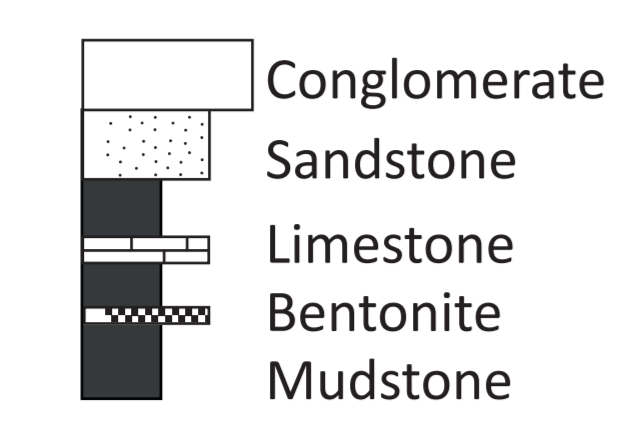

Marker beds:

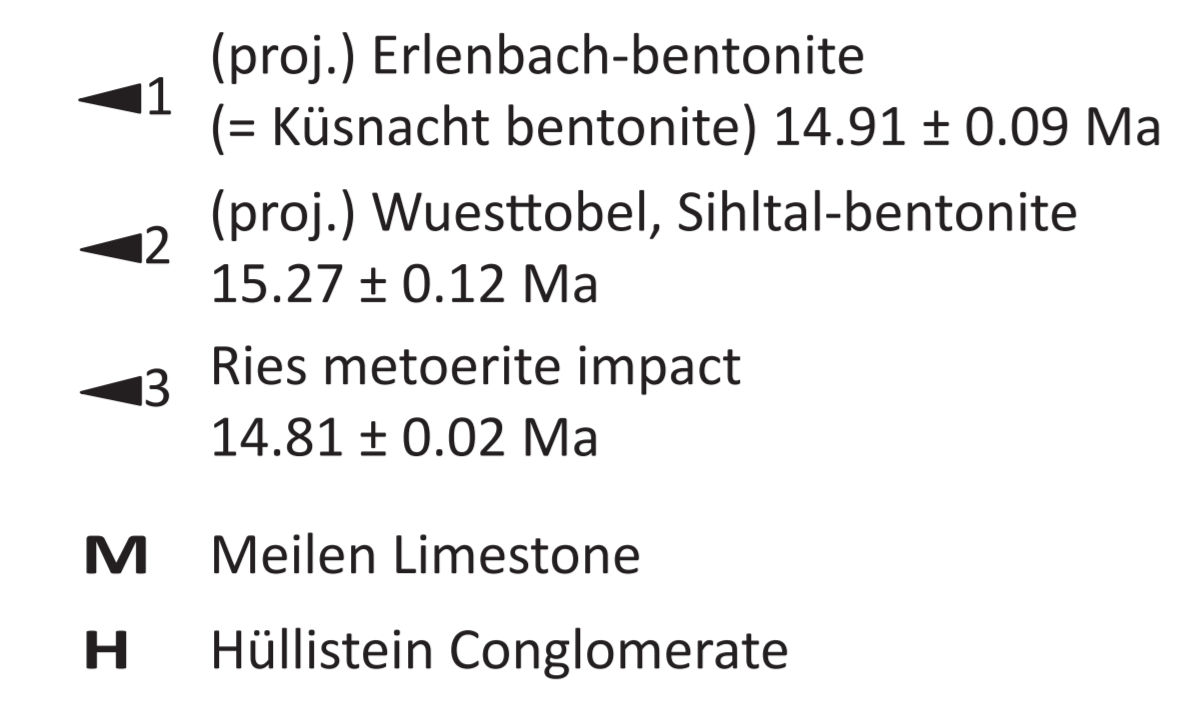

Mammal sites: \*1 - \*15

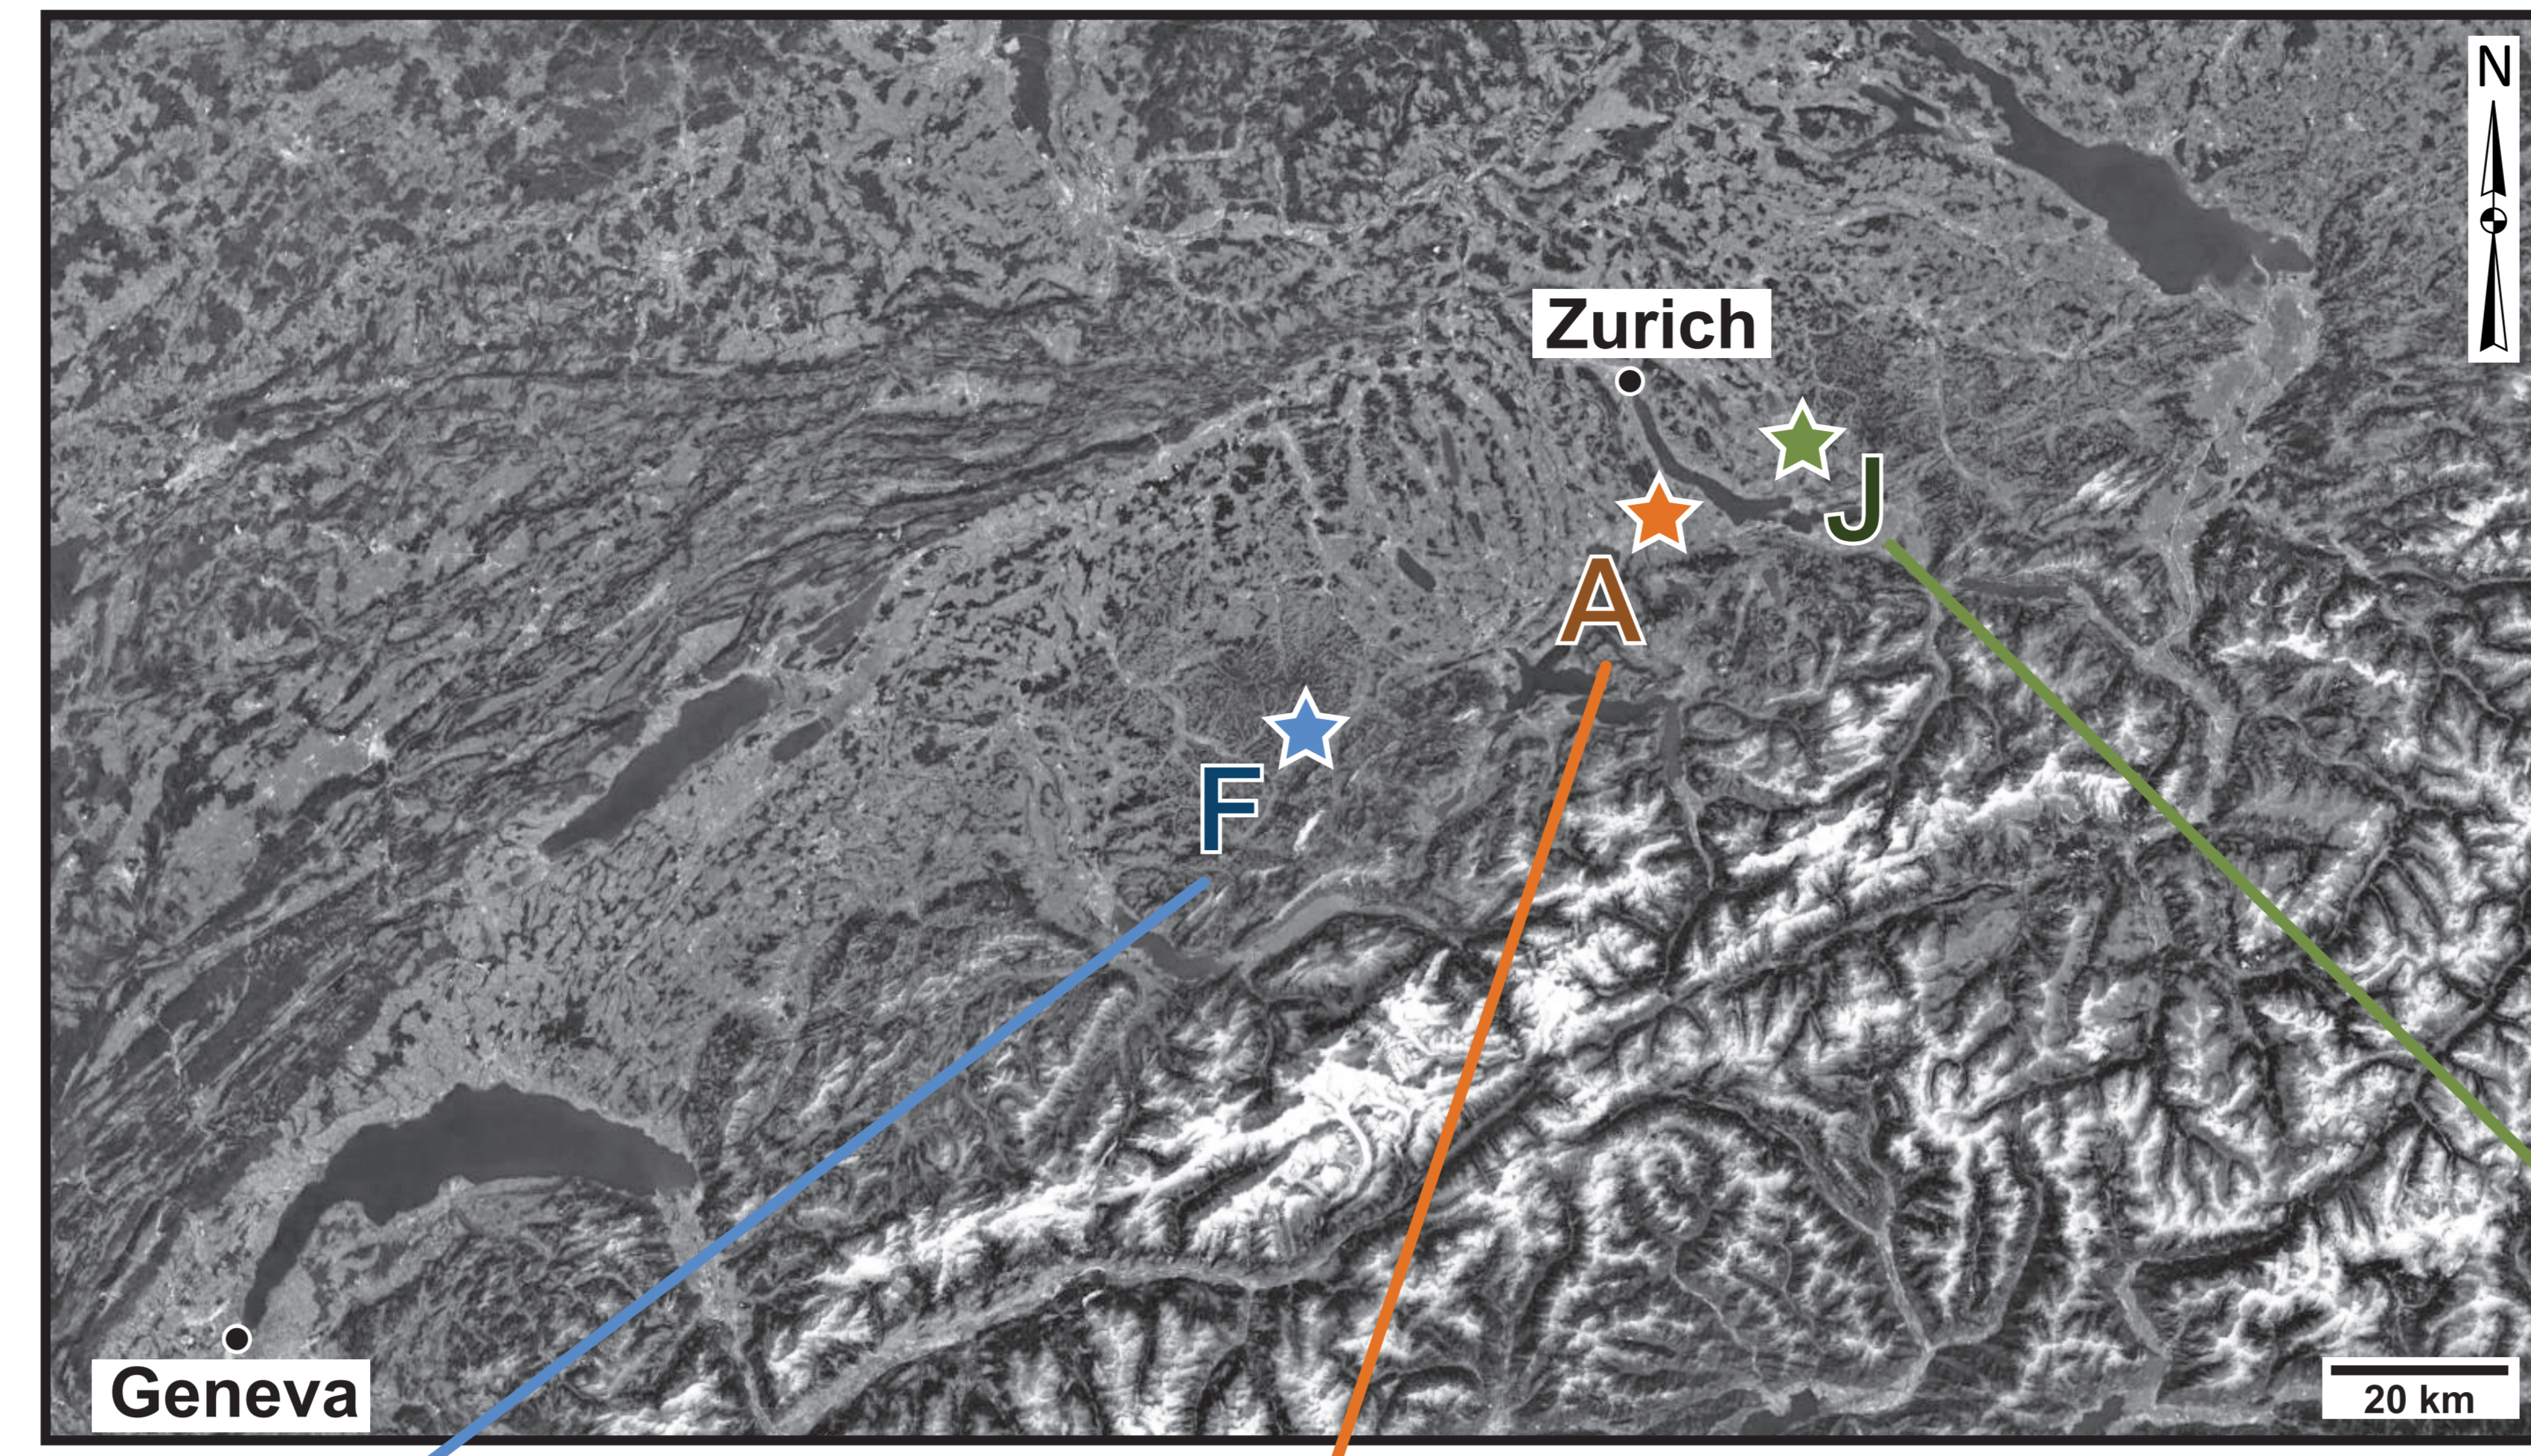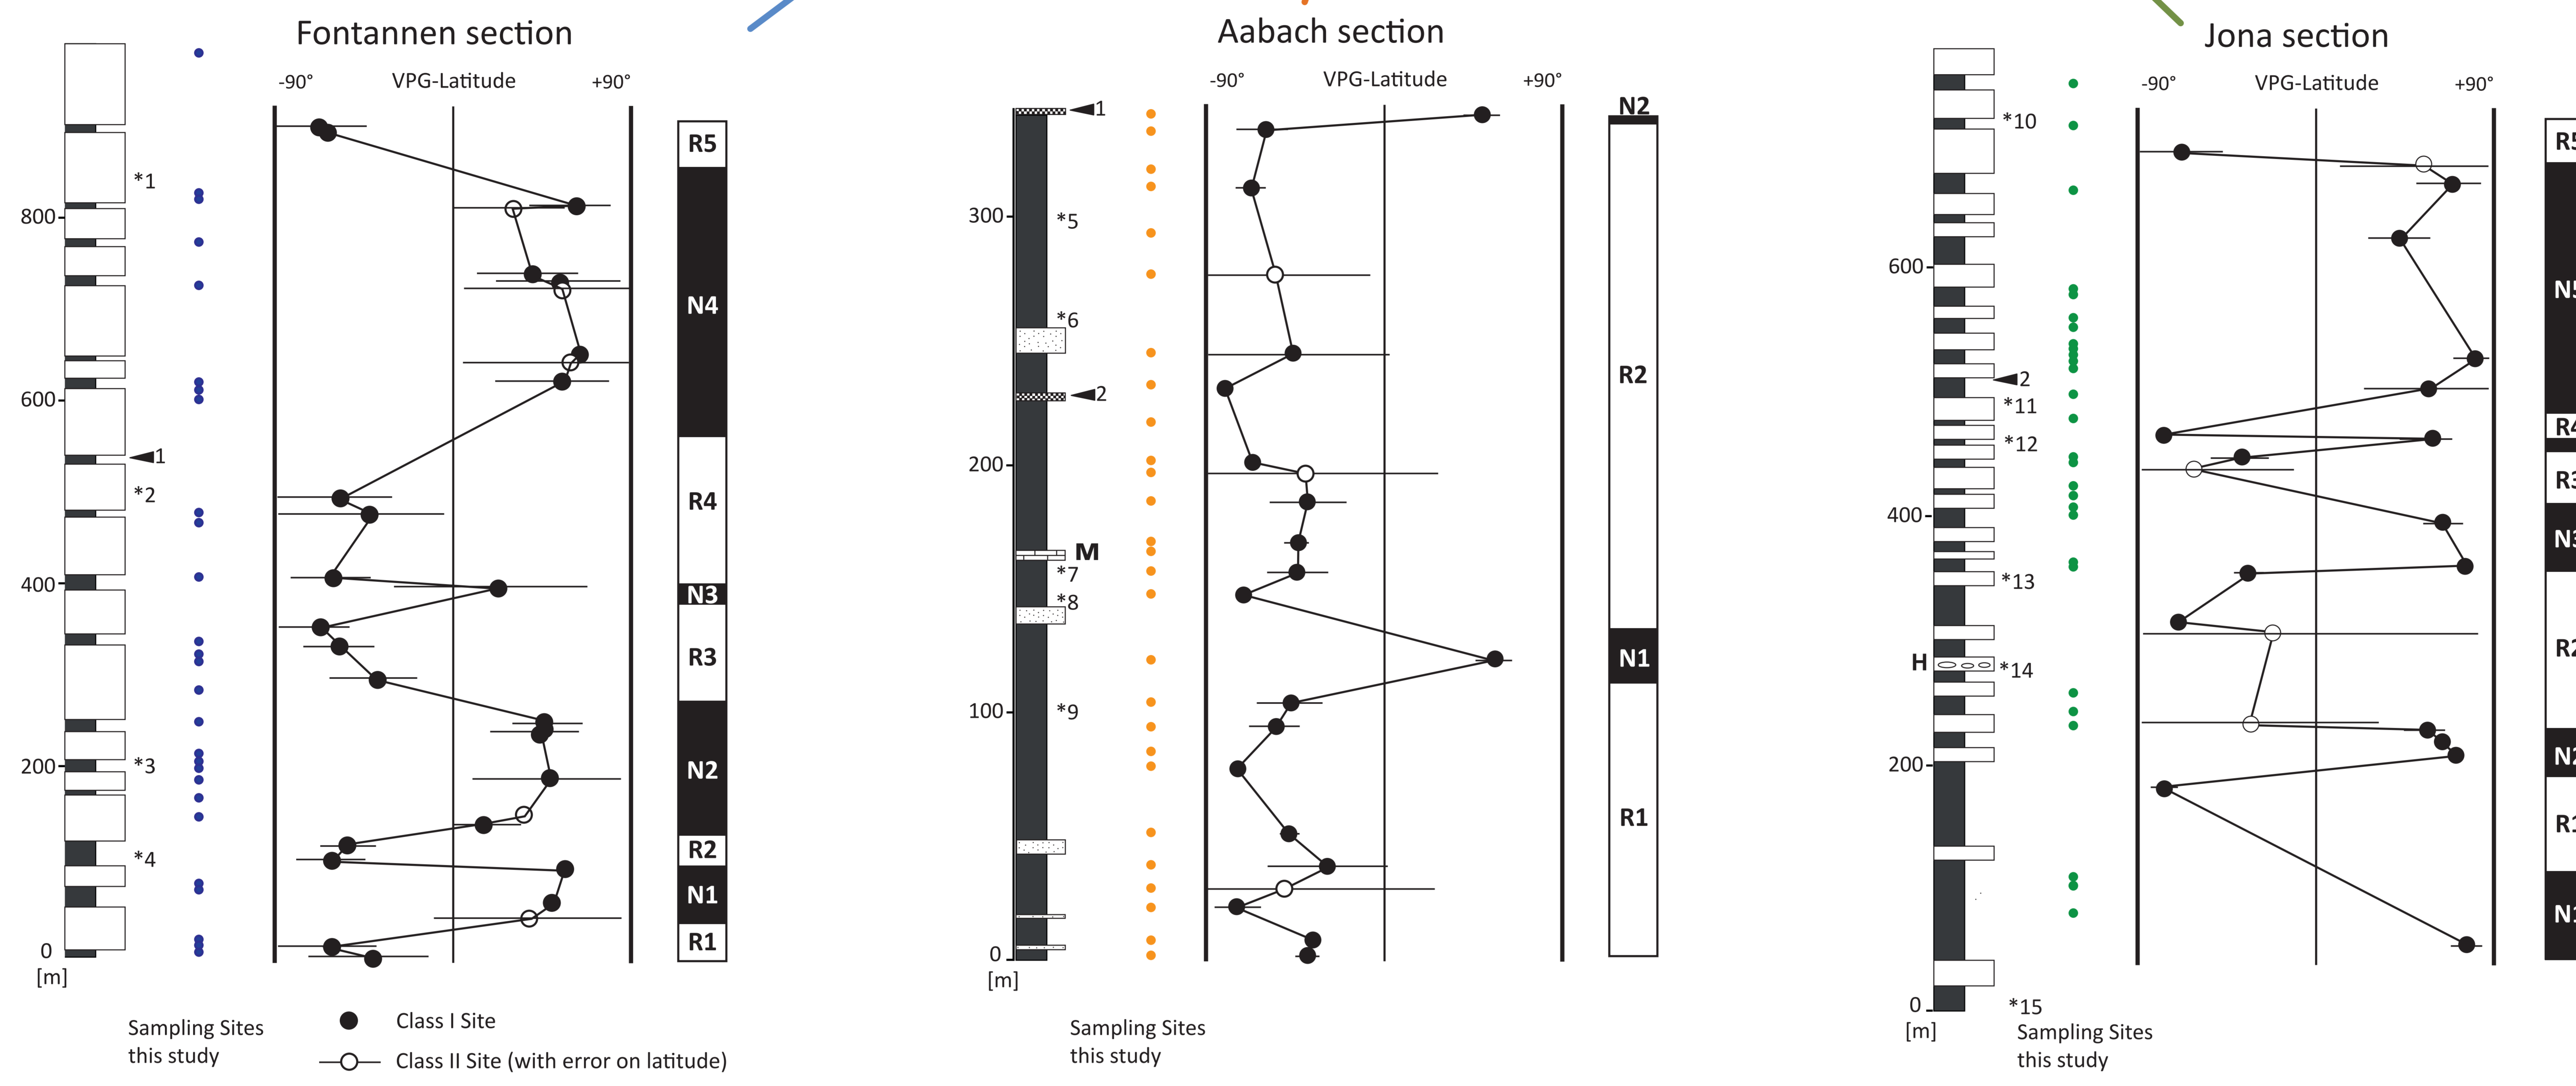

B

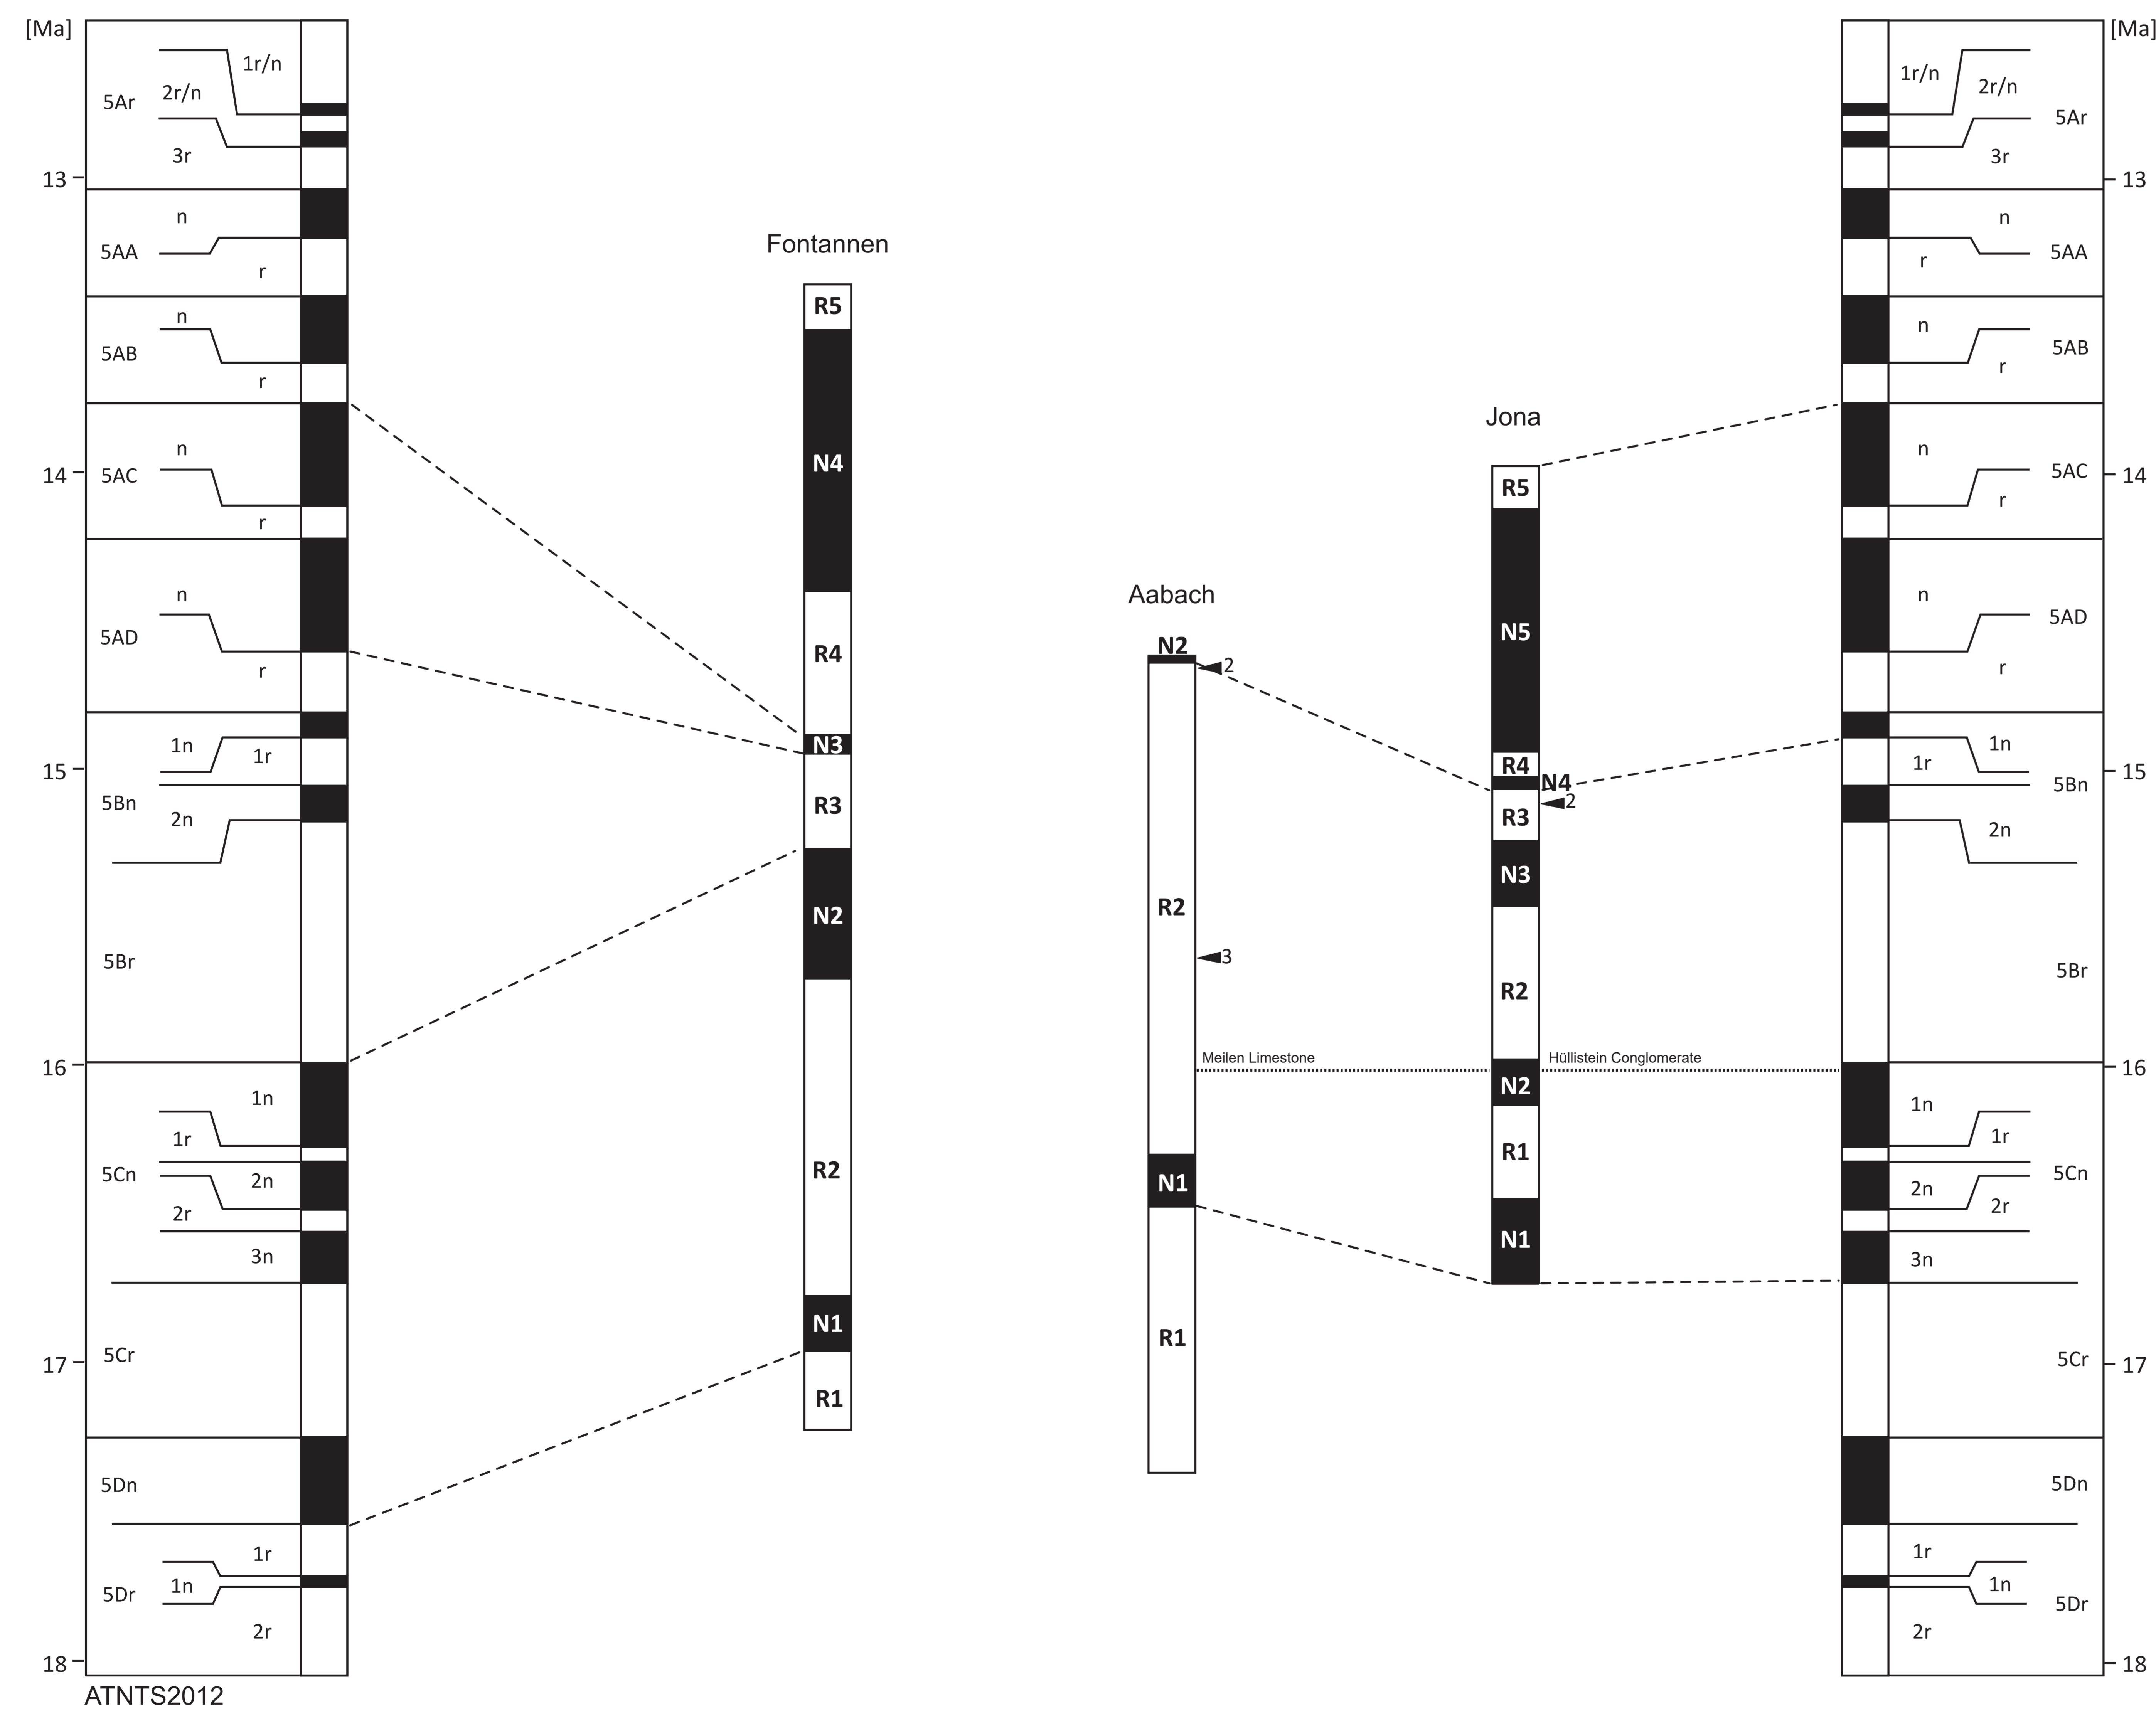

Supplement: Supplementary file 2 [file se-12-2615-2021-supplement.zip]

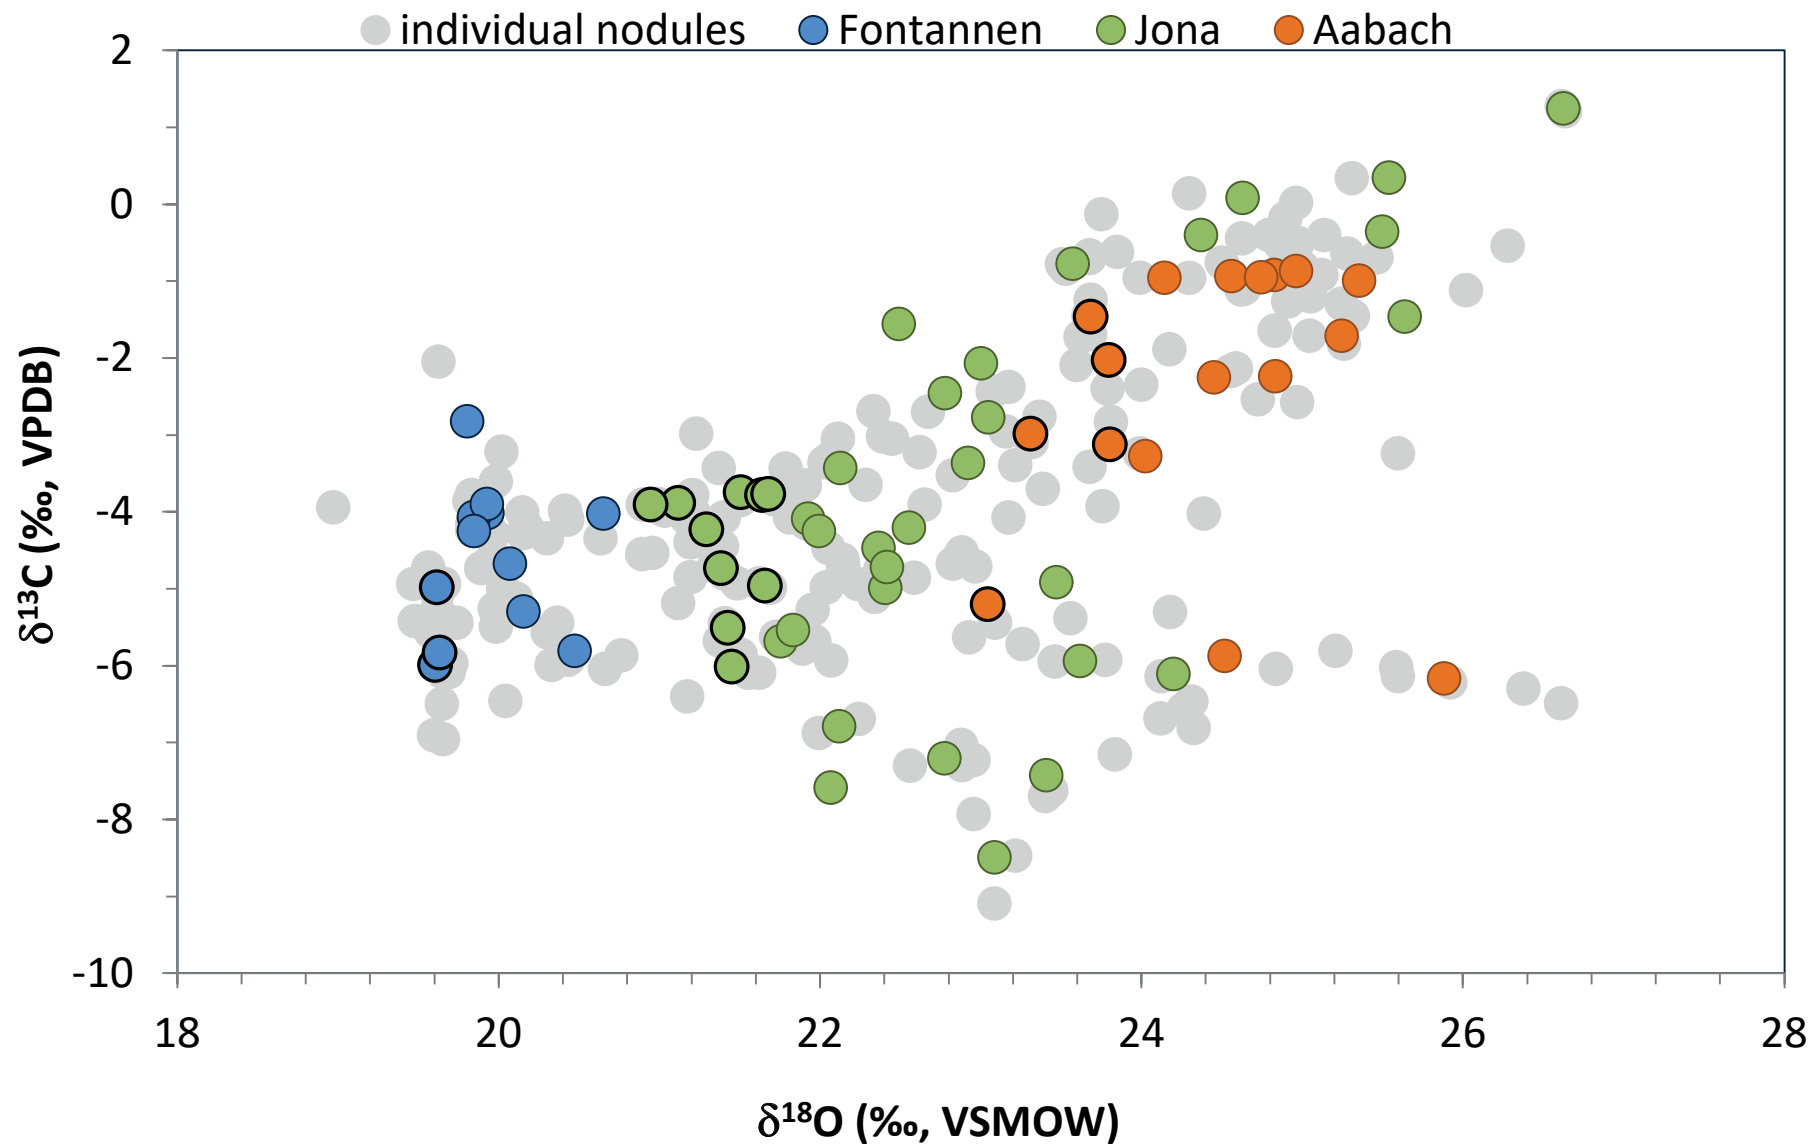

Supplement: Supplementary file 3 [file se-12-2615-2021-supplement.zip]
